# Supplementary material for: Using a multi-hypothesis framework to improve the understanding of flow dynamics during flash floods
Source: Copernicus journal article supplement (doi:10.5194/hess-2017-710), 2017-12-08
Supplement: Supplementary file [file hess-2017-710-AC3-supplement.pdf]

# Using a multi-hypothesis framework to improve the understanding of flow dynamics during flash floods

Audrey Douinot<sup>1</sup>, H el ene Roux<sup>1</sup>, Pierre-Andr e Garambois<sup>2</sup>, and Denis Dartus<sup>1</sup>

<sup>1</sup>Institut de M ecanique des Fluides de Toulouse, IMFT, Universit e de Toulouse, CNRS - Toulouse FRANCE

<sup>2</sup>Laboratoire des Sciences de l'ing enieur, de l'informatique et de l'imagerie (ICUBE) - INSA Strasbourg, Strasbourg, France

*Correspondence to:* Audrey Douinot (audreydouinot@gmail.com)

**Abstract.** A method of multiple working hypotheses was applied to a range of catchments in the Mediterranean area to analyse different types of possible flow dynamics in soils during flash flood events. The distributed, process-oriented model, MARINE, was used to test several representations of subsurface flows, including flows at depth in fractured bedrock, and flows through preferential pathways in macropores. Results showed contrasted performances of the submitted models, revealing different hydrological behaviours along the catchment set, and consequently, giving advances in characterising the flash flood processing over the Mediterranean area. Those results are supported by their consistency with the rare available in-situ measurements and the prior knowledge of several catchments. The characterisation is of course carried out within existing equifinality issues. The descriptive potential of the distributed model was then used to spot counterbalancing effects between internal flow processes and to finally propose new insights into strategical monitoring and calibration constraints setting up.

10 *Copyright statement.* The authors agree to the licence and copyright terms of Copernicus Publications as of 24 November 2017.

## 1 Introduction

### 1.1 Flash flood events: an issue for forecasters

Flash floods are “sudden floods with high peak discharges, produced by severe thunderstorms that are generally of limited areal extent”. (IAHS-UNESCO-WMO (1974); Garambois (2012); Braud et al. (2014)). They are often linked to localised and major forcings (greater than 100 mm, Gaume et al. (2009)) at the heads of steep-sided, meso-scale catchments (with surface areas of 10-250 km<sup>2</sup>). In Europe, particularly intense flash floods are observed predominantly on the north west of the Mediterranean Arc, at the level of the mountain foothills. The regions affected are highly specific and marked by the influence of the Mediterranean climate system and mountainous topography.

The large specific discharges, and intensities of precipitation, makes the flash floods being classified as extreme. Nevertheless, those events are not scarce nor unusual since on average, there were no fewer than five flash floods a year on the Mediterranean Arc between 1958 and 1994 (Jacq, 1994). Flash floods constitute a significant hazard and, therefore, a considerable risk for populations (UNISDR 2009, Llasat et al. (2014)). They are particularly dangerous due to their characteristics:

(i) the suddenness of events makes it difficult to warn populations in time, and can lead to panic, thus increasing risk, when a population is unprepared (Ruin et al., 2008); ii) the traditional connected monitoring system are not adapted to the temporal and spatial scales of the flash floods (Borga et al., 2008; Braud et al., 2014); iii) the magnitude of floods implies significant amounts of kinetic energy, which can transform transitory rivers into torrents, resulting in the transport of debris ranging from fine sediments to tree trunks, as well as the scouring of river beds and the erosion of banks (Borga et al., 2014).

A major area of interest for flash floods is, therefore, better risk assessment, to enable them to be forecasted and the relevant populations to be pre-warned. Greater knowledge and understanding is required to better identify the determining factors that result in flash floods. In particular, in order to implement a regional forecasting methodology, the properties of the catchments, and the climatic forcing and linkages between them which lead to flash flood events need to be characterised.

## 10 1.2 Flash flood events: understanding flow processes

Due to the challenges involved in forecasting flash floods, especially against a background of climate change which is tending to amplify the phenomenon (Llasat et al., 2014; Colmet Daage et al., 2016), there has been considerable research done on the subject over the last ten years. Examples include the HYDRATE project (2006-2010, Gaume and Borga (2013)), which enabled the setting up of a comprehensive European database of flash flood flash events, as well as the development of a reference methodology for the observation of post-flood events; the EXTRAFLO project (2009-2013, Lang et al. (2014)) to estimate extreme precipitation and floods for French catchments; the HYMEX project (2010-2020, Drobinski et al. (2014)) focusing on the meteorological cycle at the Mediterranean scale, and, in particular, on the conditions that allow extreme events to develop; the FLASH project (2012 - 2017, Gourley et al. (2017)) assessing the ability and the improvement of a flash flood forecasting framework in USA on the basis of real-time hydrological modelling with high resolution forcing; or the FLOODSCALE project (2012-2016, Braud et al. (2014)), based on a multi-scale experimental approach to improve observation of the hydrological processes that lead to flash floods.

In the North-Western Mediterranean context - specially concerned by specific autumnal convective meteorological events - the European cited research demonstrates, in particular, the importance of cumulative rainfall (Arnaud et al., 1999; Sangati et al., 2009),(Camarasa-Belmonte, 2016), previous soil moisture state (Cassardo et al., 2002; Marchandise and Viel, 2009; Hegedüs et al., 2013; Mateo Lázaro et al., 2014; Raynaud et al., 2015) and the storage capacity of the area affected by the precipitation (Viglione et al., 2010; Zoccatelli et al., 2010; Lobligeois, 2014; Garambois et al., 2015a; Douinot et al., 2016). The combined influence of the spatial distribution of precipitation and event-related storage capacities, reported in the study of a number of particular events (Anquetin et al., 2010; Le Lay and Saulnier, 2007; Laganier et al., 2014; Garambois et al., 2014; Faccini et al., 2016), suggests a hydrological reaction, in some areas of the catchments, that arises from localised soil saturation. This state-ment surmises that there is little direct Hortonian flow, but rather the production of runoff through excess soil saturation, or lateral fluxes in the soil resulting from the activation of preferential pathways.

The geochemical monitoring of eight intense precipitation events, over a 3.9 km<sup>2</sup> catchment area, during the FLOODSCALE project (Braud et al., 2014), revealed a "flushing" phenomenon. In at least the first 40 cm of the soil layer, the water present at the start was replaced by so-called "new" rainwater (Braud et al., 2016a; Bouvier et al., 2017). The proportion of new water

at the peak of the flood varied between 50% and 80% depending on the intensity of precipitation and the moisture level at the start of the event. Conversely, over the entire period of the event, it appears that new water accounts for only between 20% and 30% of the total volume of water discharged, which underlines the dominance of intra-soil dynamics.

Being able to define the storage capacity of the soil column is crucial in explaining the varied responses of the catchments.

5 Geological properties, which are crucial physiographic characteristics for determining the total storage capacity of catchments (Sayama et al., 2011; Pfister et al., 2017a), also appear to be markers of the storage capacities available over the time scales involved in flash floods (which are of the order of a day). From simple flow balances of flash flood events (Payraastre et al., 2012), studies of the diverse hydrological responses of several catchments over the same precipitation episode (Douinot, 2016), or the application of regional hydrological models (Garambois et al., 2015b), the literature tends to demonstrate the low storage

10 capacity of non-karst sedimentary and marl-type catchments, and, conversely, the potential for storing large volumes of water in the altered rocks of granitic or schist formations. Flow dynamics during flash floods thus appear to depend on the hydrogeological functioning of the catchments which again emphasises the importance of the saturation dynamics of the “soil + altered substratum” combination.

### 1.3 The potential of a multi-model study for understanding hydrological behaviour

15 The knowledge gained about the development of the flow processes (for example, the tracing of events carried out during the FLOODSCALE project, Braud et al. (2014)), relates to studies on a number of specific sites where flash floods could be observed while they were taking place. However, being able to generalise the knowledge gained is limited by the specific nature of each study (McDonnell et al., 2007) and by the gap between the spatial scale of forecasts (meso-scale), compared with that of the in-situ observations (<10 km<sup>2</sup>) (Sivapalan, 2003). Such hydrological modelling work can be considered as a

20 means of extrapolating knowledge to an extended geographical area, possibly covering catchments with differing physiographic properties.

Moreover, hydrological models viewed as "tentative hypotheses about catchment dynamics" are interesting tools for testing hypotheses about hydrological functioning using a systematic methodology. A considerable amount of recently published work has involved comparative studies, using numerical models to develop or validate the hypotheses about the type of hydrological

25 functioning that is most likely to reproduce hydrological responses accurately (Buytaert and Beven, 2011; Clark et al., 2011; Fenicia et al., 2014; Coxon et al., 2014; Ley et al., 2016; Fenicia et al., 2016). For example, Fenicia et al. (2014) show that the performance of different models tested on the Attert Basin in Luxembourg corroborate the various hydrological processes known to occur in this catchment; non-linear models are better for modelling the hydrological dynamics of drainage sub-catchment basins on impermeable bedrock layers and those exhibiting threshold behaviour; conversely linear models with

30 parallel storage elements led to better reproduction of the hydrological signature of the catchments with smoother responses.

The principle of "the method of multiple working hypotheses" is to compare the results from models governed by different assumptions about hydrological processes. Comparisons are even more meaningful if the structure of the models compared differs solely in terms of the hypotheses tested, in the form of modules. Doing this avoids the limitations on interpretation that are often encountered in comparative studies of models (Perrin et al., 2013), where numerical choices can influence results in-

dependently of the underlying assumptions. The comparative study makes it possible to conclude either a known hydrological functioning, which is distinguished by the better performance of the inherent model, or indeterminacy in the case of an equivalent fit of the models. The equifinality of the models remains instructive because it makes it possible to detect the underlying uncertainties behind the hypothesis of the models, which then helps determine avenues for further research.

5 The multiple working hypotheses framework is usually applied using a flexible conceptual and lumped model framework, such as the FUSE (Clark et al., 2008) or SUPERFLEX (Fenicia et al., 2011). But also, Clark et al. (2015a) and Clark et al. (2015b) have proposed a unified structure to test multiple working hypotheses within a distributed modeling framework. To our knowledge, the case study using the aforementioned frameworks are related to continuous hydrological studies in order to assess hydrological hypotheses through the overall hydrological signature of the catchments. In this work, we extend the  
10 method of multiple working hypotheses to the assessment of an event-based hydrological model framework. **The objective is to test a number of proposed hydrological functioning that occur during flash flood events on a set of contrasting catchments in the French Mediterranean area.**

#### 1.4 Current issues, objectives and plan

Other than the observations discussed above, which were made on a specific small site ( $<10 \text{ km}^2$ ), there is little information on  
15 the formation of flows in the soil and/or geological layers. While the proportion of flows passing through the soil appears to be significant, questions arise about how they form:

- Are they subsurface flows that take place in a restricted area of the root layer, as a result of preferential path activation? Or, are they lateral flows taking place at greater depth comparable to those seen in some aquifer?
- Does the geological bedrock or an altered substratum play a role limited to that of mere storage reservoir, or is it actively  
20 involved in flood flows formation?
- Can the hydrological processes be discerned from the nature of the geological bedrock?

The aim of this article is to attempt to answer these questions using a multi-model approach that tests different types of hydrological dynamics. The study was based on MARINE, a physically based, distributed hydrological model (Roux et al., 2011; Garambois et al., 2015a), which was developed specifically to model flash floods in the catchments of the French Mediterranean  
25 Arc. Several new representations for the soil column and underground flows were proposed (Douinot, 2016) and included in the MARINE model, in the form of modules that can be used to test different hydrological functions. Those different hydrological dynamics were applied to a set of catchments with physiographic properties representative of the whole of the French Mediterranean Arc. The performance of each model was then examined and subjected to a comparative study.

The structure of the publication is as follows: Section 2 describes the catchments and different datasets used in the study.  
30 Section 3 describes the MARINE model and the hypotheses about flow dynamics that were tested. Section 4 describes the evaluation methodology used to characterise the performance of each model. Section 5 presents the key results of the study, in the form of a comparative description of the simulations that resulted from the different modelling choices made. The

contributions of the results for improving the hydrological functioning understanding are lastly discussed in Section 6 before concluding.

## 5 2 Catchments and data used in the study

### 2.1 Study catchment set

We studied the behaviour of four catchments and eight nested catchments in the French Mediterranean Arc (Figure 1). The catchments (in the order they are numbered in Figure 1) were those of the Ardèche, Gardon, Hérault and Salz rivers; these were selected for the following reasons: (i) they are representative of the physiographic variability found in areas where flash floods occur; (ii) numerous studies of flash floods have already been carried out on the Gardon and Ardèche (Ruin et al., 2008; Anquetin et al., 2010; Delrieu et al., 2005; Maréchal et al., 2009; Braud et al., 2014), for example. Knowledge of the hydrological functioning of these catchments could guide the interpretation of the modelling results (Fencia et al., 2014); and (iii) a considerable number of observations of flash flood events are available for these catchments.

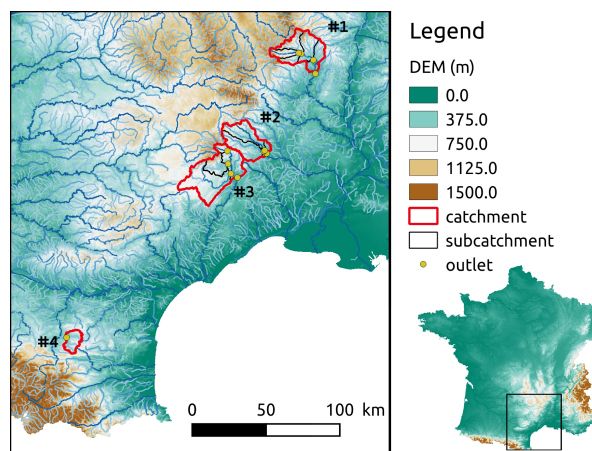

**Figure 1.** Locations of the catchments studied, with a topographic visualisation at 25 m resolution (Source: IGN, MNT BDALTI)

The main physiographical and hydrological properties of the catchments are presented in Table 1. Figure 2 shows the contrasted geological properties of the studied area : the catchments are marked by a clear upstream / downstream difference. The Ardèche catchment upstream of Ucel sits essentially on a granite bedrock with some sandstone on its edges, while downstream, the geology changes to a predominantly schist and limestone formations. Similarly, the upstream part of the Gardon catchment consists of schistose bedrock while, downstream, the bedrock is impermeable marl-type and granite formation. The Hérault catchment is splitted into mostly schist and granitic head watersheds (the Valleraugue and la Terrisse sub-catchments) and a predominantly limestone plateau (Saint Laurent le Minier sub-catchment). Finally, the Salz is characterised by sedimentary bedrock comprising sandstone and limestone (Figure 2).

The local in-situ experiments (Ribolzi et al., 1997; Braud and Vandervaere, 2015; Braud et al., 2016a, b) and the modelling studies focused on this area (Garambois et al., 2013; Vannier et al., 2013) tend to a hydrological classification according to those contrasted geological properties and in agreements with the usual hydrogeological signature found in the literature (Sayama et al., 2011; Pfister et al., 2017a). Marls, sandstone and limestones without karst are characterized by limited storage capacities, resulting in higher runoff coefficients, and high sensitivity to the initial soil moisture (Ribolzi et al., 1997; Braud et al., 2016a). In contrast, infiltration tests and analysis of electrical resistivity signals in granite and schist transects located on hillslope show high permeability of the geological substratum in depth (measured up to 2.5 m in depth); and high storage capacities reaching up to 600 mm in 7 out of 10 assessments with artificial forcing, the 3 remaining test suggesting local unaltered bedrock (Braud et al., 2016a, b). The natural resistivity profile suggests a regular soil bedrock interface when the latter consist in schist, while the granite one presents a more chaotic structure. Finally, the continuous comparative study of two experimental sites over surface areas of the order of one km<sup>2</sup> - one located on the schist upstream part of the Gardon catchment, the other one on it granite downstream part - suggests rapid subsurface flow processing on the schist area, while flow formation appears to be controlled by the extension of the saturated zone related to the river on the granitic site (Ayrat et al., 2005; Maréchal et al., 2009, 2013).

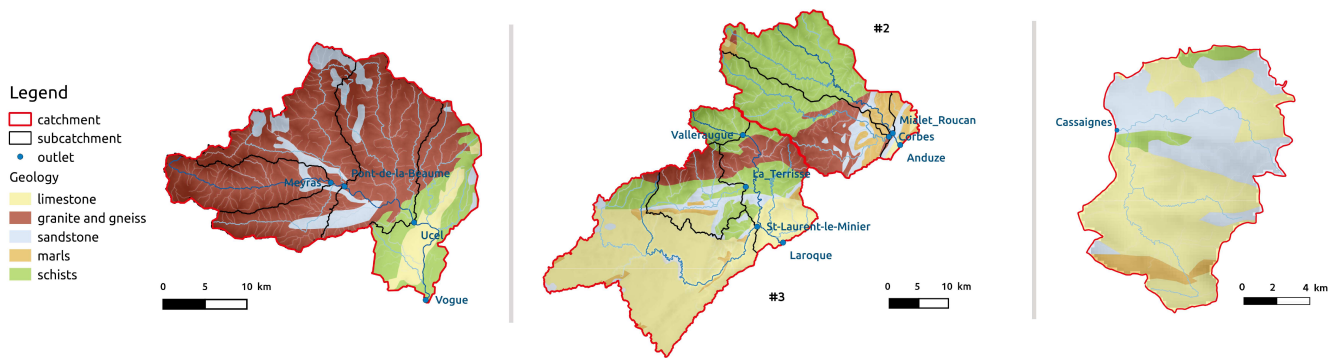

**Figure 2.** The geology of the Ardèche catchment (left), the Gardon and Hérault catchments (center), and the Salz catchment (sources : BD Million-Géol, BRGM)

Table 1 summarises the main geological, soil and topographical characteristics of the catchments studied.

**Table 1.** Physiographic properties and hydrological statistics of the 12 catchments *ID*: coding name of the catchments used at figure 1 and table 2; area [ $\text{km}^2$ ]; mean slope [-]; soil properties: mean soil depth [m] and main soil texture (Tx) : Ls = sandy loam texture, L = loam texture; Lsi = silty loam texture; Geology: percentage of bedrock geology [%] including sandstone (Sa), limestone (Li), granite and gneiss (GG), marls (Ma) and schists (Sc) subcategories - <sup>(i)</sup> bold values are the dominant geology; mean annual precipitation ( $P[\text{mm}]$ ); Hydrometry: discharge time-series availability (Period); mean inter-annual discharge ( $Q[\text{m}^3.\text{km}^{-2}.\text{s}^{-1}]$ ); 2 year return period of maximum daily discharge ( $Q_{D2}[\text{m}^3.\text{km}^{-2}.\text{s}^{-1}]$ ); 10 year return period of maximum hourly discharge ( $Q_{H10}[\text{m}^3.\text{km}^{-2}.\text{s}^{-1}]$ ). Hydrometric statistics are calculated from HydroFrance databank, (<http://www.hydro.eaufrance.fr/>) and the pluviometric ones using rainfall data from the raingauge network of the French flood forecasting services.

| ID  | River     | Outlet               | Area Slope                |              | Soil properties |           | Geology <sup>(i)</sup> |             |             |           |              | $P$<br>[mm] | Hydrometry                                         |                                                           |                                                            |                  |
|-----|-----------|----------------------|---------------------------|--------------|-----------------|-----------|------------------------|-------------|-------------|-----------|--------------|-------------|----------------------------------------------------|-----------------------------------------------------------|------------------------------------------------------------|------------------|
|     |           |                      | Area<br>[ $\text{km}^2$ ] | Slope<br>[-] | Depth<br>[m]    | Tx<br>[-] | Sa<br>[%]              | Li<br>[%]   | GG<br>[%]   | Ma<br>[%] | Sc<br>[%]    |             | Q<br>[ $\text{m}^3.\text{km}^{-2}.\text{s}^{-1}$ ] | $Q_{D2}$<br>[ $\text{m}^3.\text{km}^{-2}.\text{s}^{-1}$ ] | $Q_{H10}$<br>[ $\text{m}^3.\text{km}^{-2}.\text{s}^{-1}$ ] | Period<br>Period |
| #1a | L'Ardèche | Vogüié               | 622                       | 0.17         | 0.47            | Ls        | 10.5                   | 5.7         | <b>71.9</b> | 0.0       | 11.9         | 1587        | 0.041                                              | 0.62                                                      | 2.25                                                       | 00 - 15          |
| #1b |           | Ucel                 | 477                       | 0.20         | 0.45            | Ls        | 13.7                   | 0.0         | <b>84.5</b> | 0.0       | 1.8          | 1577        | 0.046                                              | 0.79                                                      | 2.30                                                       | 05 - 15          |
| #1c |           | Pont de la Beaume    | 292                       | 0.22         | 0.39            | Ls        | 14.0                   | 0.0         | <b>86.0</b> | 0.0       | 0.0          | 1690        | 0.056                                              | 0.75                                                      | 2.53                                                       | 00 - 15          |
| #1d |           | Meyras               | 99                        | 0.24         | 0.32            | Ls        | 5.4                    | 0.0         | <b>94.6</b> | 0.0       | 0.0          | 1720        | 0.036                                              | 0.72                                                      | 2.92                                                       | 00 - 15          |
| #2a | Le Gardon | Anduze               | 543                       | 0.16         | 0.25            | L         | 7.2                    | 1.5         | 18.0        | 12.1      | <b>61.2</b>  | 1370        | 0.026                                              | 0.48                                                      | 1.82                                                       | 94 - 15          |
| #2b |           | Corbès               | 220                       | 0.16         | 0.27            | L         | 9.3                    | 0.0         | 34.2        | 9.0       | <b>47.5</b>  | 1460        | 0.022                                              | 0.57                                                      | 2.28                                                       | 94 - 15          |
| #2c |           | Mialet Roucan        | 240                       | 0.17         | 0.22            | L         | 2.0                    | 0.6         | 2.9         | 9.4       | <b>85.1</b>  | 1407        | 0.023                                              | 0.62                                                      | 2.54                                                       | 02 - 15          |
| #3a | L'Hérault | Laroque              | 912                       | 0.14         | 0.26            | Lsi       | 6.7                    | <b>54.5</b> | 11.7        | 3.2       | 24.0         | 1160        | 0.019                                              | 0.39                                                      | 1.21                                                       | 00 - 15          |
| #3b | La Vis    | St Laurent le Minier | 499                       | 0.10         | 0.26            | Lsi       | 4.0                    | <b>83.0</b> | 1.0         | 3.2       | 8.8          | 930         | 0.018                                              | 0.42                                                      | 1.10                                                       | 00 - 15          |
| #3c | L'Arre    | La Terrisse          | 155                       | 0.19         | 0.25            | L         | 19.5                   | 12.3        | 27.2        | 6.2       | <b>34.8</b>  | 1130        | 0.027                                              | 0.61                                                      | 2.0                                                        | 00 - 15          |
| #3d | L'Hérault | Valleraugue          | 46                        | 0.27         | 0.25            | L         | 0.0                    | 0.0         | 0.0         | 0.0       | <b>100.0</b> | 1920        | 0.049                                              | 1.13                                                      | 4.0                                                        | 08 - 15          |
| #4  | La Salz   | Cassaigne            | 144                       | 0.13         | 0.37            | Lsi       | 33.5                   | <b>56.5</b> | 0.0         | 5.1       | 4.9          | 700         | 0.008                                              | 0.20                                                      | 1.31                                                       | 01 - 15          |



## 2.2 Forcing inputs and hydrometric data

The hydrometric data were derived from the network of operational measurements (HydroFrance databank, <http://www.hydro.eaufrance.fr/>). Eight to twenty years of hourly discharge observations were available, according to the dates when the hydrometric stations were installed.

Flood events with peak discharges that had exceeded the 2-year return period daily discharge ( $Q_{D2}$ , in Table 1, corresponds to the alert threshold for flood forecasting centres in France) were selected as events to be included in the study. Thus, only one criterion for hydrological response was considered. This led to a selection of precipitation events of varying origins (for instance: rainfall induced by mountains, stagnant convective cells; and rainfall occurring in different seasons - mainly in autumn and early spring). Such a selection risked complicating the study because flow processes can vary from one season to another. Nevertheless, it allowed us to test the ability of the model to deal with different (non linear) flow physics regimes. The aim of this selection was to be able to analyse, more broadly, overall catchment behaviour during intense hydrological activity. Note also that, moderate or intense rainfall events without respective hydrological response might be abducted from the analysis. Nevertheless the first alert threshold used here is small enough to have a selection of flood events with contrasted runoff coefficient (see Table 2).

Precipitation measurements were taken from Météo France's ARAMIS radar network (Tabary, 2007), which provides precipitation measurements, at a resolution of  $1\text{ km} \times 1\text{ km}$ , every five minutes. The French flood forecasting service (SCHAPI: Service central d'hydrométéorologie et d'appui à la prévision des inondations) used then the CALAMAR patented software (Badoche-Jacquet et al., 1992) to produce rainfall depth data by combining these radar measurements with raingauge data. This processed dataset is here used as inputs of the model. Each rainfall product is firstly assessed through an individual sensitivity analysis of the standard MARINE model (DWF model, see section 3.1). When presenting an atypical sensitivity to the soil depth parameter, the rainfall event is discarded of the study, as suggesting questionable measurements. Depending on the availability of the results of rainfall and hydrometric measurements, 7 to 14 intense events were selected for each catchment (Table 2). Each set is finally splitted into a calibration and validation subsets as follow: the extreme events were kept for validation. A minimum number of calibration events is chosen in order to cover the wide range of soil moisture initial condition.

Some differences in meteorological forcing and the hydrological responses of catchments can be noted. The Ardèche (#1) is subject to more significant events in terms of cumulative precipitation, with a notable orographic gradient. In contrast, cumulative precipitations in the Salz catchment (#4) are the lowest. The highest precipitation intensities have been recorded in the Gardon catchment (#2). The events selected on this catchment cover a wide range of peak flows despite relatively uniform cumulative precipitation. The Hérault catchments (#3) at Laroque and Saint Laurent le Minier had more uniform hydrological responses for meteorological forcing similar to that of the Gardon catchment in terms of precipitation, but these were lower in intensity.

As the MARINE model is event-based, it must be initialised to take into account the previous moisture state of the catchment, which is linked to the history of the hydrological cycle. This was done using spatial model outputs from Météo-France's SIM operational chain (Habets et al., 2008), including a meteorological analysis system (SAFRAN, Vidal et al. (2010)), a soil -



vegetation - atmosphere model (ISBA, Mahfouf et al. (1995)) and a hydrogeological model (MODCOU, Ledoux et al. (1989)). Based on the work of Marchandise and Viel (2009), the spatial daily root-zone humidity outputs (resolution =  $8 \text{ km} \times 8 \text{ km}$ ) simulated by the SIM conceptual model were used for the systematic initialisation of MARINE.

**Table 2.** Properties of the flash flood events: average on the event set ( $\pm$  standard deviation). *ID*: coding name of the concerned catchments (Figure 1 : #1 for the Ardèche; #2 for the Gardon; #3 for the Hérault and #4 for the Salz);  $N_{evt}$ : number of observed flash flood events;  $P$  [mm] mean precipitation ;  $I_{max}$  [ $\text{mm.h}^{-1}$ ]: maximal intensity rainfall per event;  $Q_{peak}$ : specific flood peak [ $\text{m}^3.\text{km}^{-2}.\text{s}^{-1}$ ]; Hum: initial soil moist moisture according to SIM output (Habets et al., 2008); CR: runoff coefficient [%]

| ID  | Outlet               | $N_{evt}$ | $P$ [mm]          | $I_{max}$ [ $\text{mm.h}^{-1}$ ] | $Q_{peak}$ [ $\text{m}^3.\text{km}^{-2}.\text{s}^{-1}$ ] | Hum [%]        | CR [-]              |
|-----|----------------------|-----------|-------------------|----------------------------------|----------------------------------------------------------|----------------|---------------------|
| #1a | Vogüé                | 10        | 192 ( $\pm 93$ )  | 17.3 ( $\pm 6.2$ )               | 1.33 ( $\pm 0.57$ )                                      | 58 ( $\pm 6$ ) | 0.50 ( $\pm 0.16$ ) |
| #1b | Ucel                 | 10        | 208 ( $\pm 105$ ) | 19.1 ( $\pm 7.1$ )               | 1.41 ( $\pm 0.70$ )                                      | 56 ( $\pm 5$ ) | 0.47 ( $\pm 0.17$ ) |
| #1c | Pont de la Beaume    | 10        | 222 ( $\pm 122$ ) | 20.5 ( $\pm 6.2$ )               | 1.79 ( $\pm 0.82$ )                                      | 56 ( $\pm 5$ ) | 0.51 ( $\pm 0.22$ ) |
| #1c | Meyras               | 10        | 235 ( $\pm 141$ ) | 25.6 ( $\pm 10.6$ )              | 2.15 ( $\pm 1.15$ )                                      | 56 ( $\pm 4$ ) | 0.51 ( $\pm 0.20$ ) |
| #2a | Anduze               | 13        | 182 ( $\pm 69$ )  | 26.9 ( $\pm 12.6$ )              | 2.10 ( $\pm 1.67$ )                                      | 53 ( $\pm 7$ ) | 0.31 ( $\pm 0.13$ ) |
| #2b | Corbès               | 14        | 196 ( $\pm 73$ )  | 31.4 ( $\pm 11.6$ )              | 1.90 ( $\pm 0.93$ )                                      | 55 ( $\pm 7$ ) | 0.32 ( $\pm 0.15$ ) |
| #2c | Mialet Roucan        | 14        | 177 ( $\pm 72$ )  | 30.9 ( $\pm 13.2$ )              | 1.85 ( $\pm 0.85$ )                                      | 51 ( $\pm 7$ ) | 0.33 ( $\pm 0.15$ ) |
| #3a | Laroque              | 7         | 188 ( $\pm 95$ )  | 16.0 ( $\pm 8.1$ )               | 0.82 ( $\pm 0.43$ )                                      | 59 ( $\pm 8$ ) | 0.45 ( $\pm 0.16$ ) |
| #3b | St Laurent le Minier | 7         | 153 ( $\pm 95$ )  | 18.4 ( $\pm 8.9$ )               | 1.14 ( $\pm 0.31$ )                                      | 56 ( $\pm 9$ ) | 0.47 ( $\pm 0.16$ ) |
| #3c | La Terrisse          | 7         | 193 ( $\pm 103$ ) | 22.1 ( $\pm 12.1$ )              | 1.63 ( $\pm 0.87$ )                                      | 52 ( $\pm 8$ ) | 0.60 ( $\pm 0.23$ ) |
| #3d | Valleraugue          | 7         | 156 ( $\pm 110$ ) | 16.4 ( $\pm 8.7$ )               | 2.14 ( $\pm 1.33$ )                                      | 48 ( $\pm 6$ ) | 0.62 ( $\pm 0.22$ ) |
| #4  | Cassaigne            | 8         | 136 ( $\pm 47$ )  | 17.8 ( $\pm 6.2$ )               | 1.48 ( $\pm 0.64$ )                                      | 57 ( $\pm 7$ ) | 0.55 ( $\pm 0.24$ ) |

### 3 The multi-hypothesis hydrological modelling framework

#### 3.1 The MARINE model

The MARINE model is a distributed mechanistic hydrological model specially developed for flash flood simulations. It models the main physical processes in flash floods: infiltration, overland flow, lateral flows in soil and channel routing. Conversely, it does not incorporate low-rate flow processes such as evapotranspiration or base flow.

MARINE is structured into three main modules that are run for each catchment grid cell (see Figure 3). The first module allows the separation of surface runoff and infiltration using the Green-Ampt model. The second module represents subsurface downhill flow. It was initially based on the generalised Darcy Law used in the TOPMODEL hydrological model (Roux et al., 2011), but was developed in greater detail as part of this study. Lastly, the third module represents overland and channel flows. Rainfall excess is transferred to the catchment outlet using the Saint-Venant equations simplified with kinematic wave assumptions. The model distinguishes grid cells with a drainage network (where channel flow is calculated on a triangular

channel section (Maubourguet et al., 2007)) from grid cells on hillslopes (where overland flow is calculated for the entire surface area of the cell).

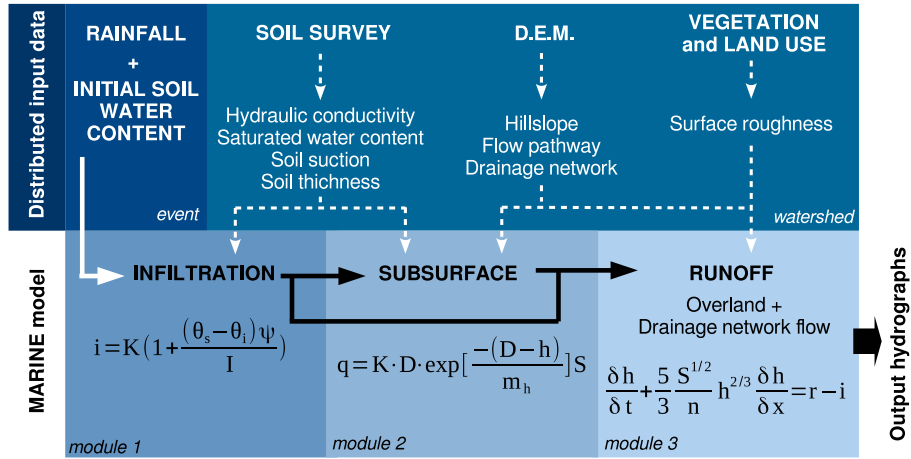

**Figure 3.** The MARINE model structure, parameters and variables. The Green and Ampt infiltration equation contains the following parameters: infiltration rate  $i$  [ $\text{m}\cdot\text{s}^{-1}$ ], cumulative infiltration  $I$  [ $\text{mm}$ ], saturated hydraulic conductivity  $k$  [ $\text{m}\cdot\text{s}^{-1}$ ], soil suction at the wetting front  $\Psi$  [ $\text{m}$ ], and, saturated and initial water contents,  $\theta_s$  and  $\theta_i$  [ $\text{m}^3\cdot\text{m}^{-3}$ ], respectively. Subsurface flow contains the following parameters: soil thickness [ $\text{m}$ ], lateral saturated hydraulic conductivity  $K$  [ $\text{m}\cdot\text{s}^{-1}$ ], local water depth  $h$  [ $\text{m}$ ], transmissivity decay with depth  $m_h$  ( $\text{m}$ ), and bed slope  $S$  [ $\text{m}\cdot\text{m}^{-1}$ ]. The kinematic wave contains the following parameters: surface water depth  $h$  [ $\text{m}$ ], time  $t$  [ $\text{s}$ ], space variable  $x$  [ $\text{m}$ ], rainfall rate  $r$  [ $\text{m}\cdot\text{s}^{-1}$ ], infiltration rate  $i$  [ $\text{m}\cdot\text{s}^{-1}$ ], bed slope  $S$  [ $\text{m}\cdot\text{m}^{-1}$ ], Manning roughness coefficient  $n$  [ $\text{m}^{-1/3}\cdot\text{s}$ ]. The Module 2 described in this figure corresponds to the standard definition applied in the MARINE model. It corresponds, in fact, to the scope of model modifications proposed in this study, which are described in the next section (section 3.2.)

The MARINE model works with distributed input data such as: i) a digital elevation model (DEM) of the catchment to shape the flow pathway and distinguish hillslope cells from drainage network cells, according to a drained area threshold; ii) soil survey data to initialize the hydraulic and storage properties of the soil, which are used as parameters in the infiltration and lateral flow models; iii) vegetation and land-use data to configure the surface roughness parameters used in the overland flow model.

The MARINE model requires parameters to be calibrated in order to be able to reproduce hydrological behaviours accurately. Based on sensitivity analyses of the Garambois et al. (2013) model, five parameters are calibrated: soil depth -  $C_z$ , the saturation hydraulic conductivity used in lateral flow modelling -  $C_{k_{ss}}$ , hydraulic conductivity at saturation, used in infiltration modelling -  $C_k$ , and friction coefficients for low and high-water channels -  $n_r$  and  $n_p$ , respectively, with  $n_r$  and  $n_p$  uniform throughout the drainage network.  $C_{k_{ss}}$ ,  $C_k$  and  $C_z$  are the multiplier coefficients for spatialised, saturated hydraulic conductivities and soil depths. In this study, it was specifically Module 2 (i.e. subsurface downhill flow) that was subject to modifications in order to determine the possible ways that a number of proposals for intra-soil hydrological functioning could be modelled. To do this, modifications were made to the parameters  $C_z$  and  $C_{k_{ss}}$ .

### 15 3.2 Modelling lateral flows in the soil: the development of a multi-hypothesis framework

The role of altered rocks has been demonstrated in the previous work of Payraastre et al. (2012); Vannier et al. (2013); Garambois et al. (2015b). The integration of this hydrologically active zone into MARINE was done by the calibration of  $C_z$ : soil-depth data from the BDsol databases (Robbez-Masson et al., 2002) are artificially increased to take account of the substratum.

Here, the aim was to integrate hydrological activity at depth, especially given that it seems to differ according to the geological properties of the bedrock (Fenicia et al., 2014; Pfister et al., 2017a). We proposed a number of modifications to Module 2 covering three hypotheses about hydrological functioning:

- Deep Water Flow model (DWF): we assumed deep infiltration and the formation of an aquifer flow in highly altered rocks. In hydrological terms the pedology-geology boundary was transparent. The soil column could be modelled as a single entity of depth  $D_{tot}$  (m), which is at least equal to the soil depth  $D_{BDsol}$  (m) (see Figure 4). Given the lack of knowledge and available observations, a uniform calibration was applied to the depth of altered rocks -  $D_{WB}$  (m) - a level that is rapidly accessible on the scale of a rain event. Groundwater flow was described using the generalised Darcy Law ( $q_{dw}$ , Equation 1). The exponential growth of the hydraulic conductivity at saturation, as the water table ( $h_{dw}$ ) rises, assumed an altered-rock structure where hydraulic conductivity at saturation decreases with depth (the TOPMODEL approach).

$$30 \quad q_{dw} = K_{dw} \cdot D_{tot} \exp\left(\frac{h_{dw} - D_{tot}}{m_h}\right) \cdot S \quad (1)$$

with  $h_{dw}[m]$ , the water depth of the unique water table;  $m_h[m]$ , the decay factor of the hydraulic conductivity at saturation with soil depth;  $S[-]$ , the bed slope;  $K_{dw} = C_{kdw} \cdot K_{BDsol}[m \cdot s^{-1}]$ , the simulated hydraulic conductivity at saturation; and  $D_{tot} = D_{BDsol} + D_{WB}$ , the soil column depth. Calibrated parameters are in red color.

- Subsurface Flow model (SSF): We assumed that the formation of subsurface lateral flows was due to the activation of preferential paths, like the in-situ observations of Katsura et al. (2014) and Katsuyama et al. (2005). The altered soil-rock interface acts as a hydrological barrier. The rapid saturation of shallow soils results in the development of rapid flows due to the steep slopes of the catchments and the existence of rapid water flows circulating through the macropores as the soil becomes saturated. The soil column was thus represented by a two-layer model (see Figure 5): an upper layer of depth equal to the soil depth  $D_{BDsol}$  (m) and a lower layer of uniform depth  $D_{WB}$  (m). The lateral flows in the upper layer were described by the generalised Darcy Law. However, variations in hydraulic conductivity were expressed as a function of the mean water content of the layer ( $\theta_{soil}$ ) and not of the height of water ( $h_{soil}$ ) that would form a perched water table (Equation 2). Expressing the variability in hydraulic conductivity as a function of the saturation rate indeed appears to be a more appropriate choice for representing the activation of preferential paths in the soil by the increase in the degree to which the soil is filled. The decay factor of the hydraulic conductivity as a function of the saturation rate -  $m_\theta$  - was set according to the linearized empirical relations, developed by Van Genuchten (1980), between hydraulic conductivity and soil water content for the different classes of soil textures. Flows in the lower soil layer ( $q_{dw}$ , Equation 3), in the form of a deep aquifer, were limited by setting the hydraulic conductivity of the substratum as being equivalent

15 to that of the soil divided by 50 (this choice being guided by the orders of magnitude generally observed in the literature (Le Bourgeois et al., 2016; Katsura et al., 2014)). The altered rocks were thus assumed to play, mainly, a storage role. Infiltration occurring between the two layers was initially restricted by the Richards equations which were incorporated using the set hydraulic properties of the substratum (Equation 4). When the upper layer is saturated, filling by a piston effect is allowed. The depth of the soil layer,  $D_{BDsol}$ , was set according to the soil data, while the depth of the substratum  
 20 -  $D_{WB}$  - was calibrated in the same way as in the DWF model.

$$q_{ss} = K_{ss} \cdot D_{BDsol} \exp\left(\frac{\theta_{soil} - 1}{m_\theta}\right) \cdot S \quad (2)$$

$$q_{dw} = K_{dw} \cdot D_{WB} \exp\left(\frac{h_{WB} - D_{WB}}{m_h}\right) \cdot S \quad (3)$$

$$q_{inf} = -K_{dw} \frac{\delta H(\theta_{soil}, \theta_{WB})}{\delta z} \quad (4)$$

25 with:  $h_{soil}$  and  $h_{WB}$  [m], the soil water depth in the upper and lower layer respectively;  $\theta_{soil}$  and  $\theta_{WB}$  [-], the soil water content of the upper and lower layer respectively;  $m_\theta$  [-], the decay factor of the hydraulic conductivity with soil water content  $\theta_{soil}$ ; and  $K_{ss} = C_{kss} \cdot K_{BDsol}$  and  $K_{dw} = 0.02 \cdot K_{ss}$  [ $m \cdot s^{-1}$ ], the simulated hydraulic conductivity at saturation of the upper and lower layer in the SSF model respectively.

- The Subsurface and Deep Water Flow model (SSF-DWF): It was assumed that the presence of subsurface flow was due to both local saturation of the top of the soil column, but also the development of a flow at depth, as a result of significant volumes of water introduced by infiltration and a very altered substratum whose apparent hydraulic conductivity was already relatively high. This hypothesis of the process led to a modelling approach analogous to the SSF model (Figure 5), where the hydraulic conductivity at substrate saturation -  $K_{dw}$  - was no longer simply imposed, but, instead, calibrated using an additional coefficient,  $C_{kdw}$ .

$$5 \quad K_{dw} = C_{kdw} \cdot K_{BDsol} \quad \text{in SSF-DWF model} \quad (5)$$

The soil water content prior to simulation was, similarly, initialised for each model, in order to ensure, for a fixed depth of altered rock, that the same volume of water was allocated for all models. The SIM humidity indices (Section 2.2) were used to set an overall water content for all groundwater flow models for a given flood, with the two compartments of the SSF and SSF-DWF models then having an equal water content at initialisation.

## 10 4 Methodology for calibrating and evaluating the models

### 4.1 Calibration method

The three hydrological models studied - DWF, SSF and SSF-DWF - were calibrated for each catchment by weighting 5,000 randomly drawn samples from the parameter space for each model (the Monte Carlo Method). The weighting was done using the DEC (Discharge Envelope Catching) score (equation 6), discussed by Douinot et al. (2017), in order to integrate the a priori

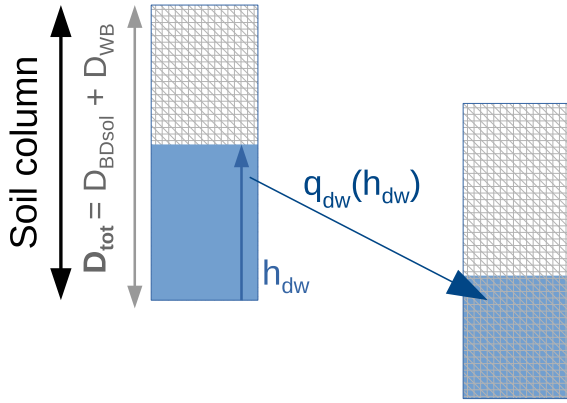

**Figure 4.** DWF model: flow generation by infiltration at depth and support of a deep aquifer ( $q_{dw}(h_{dw})$ , equation 1).

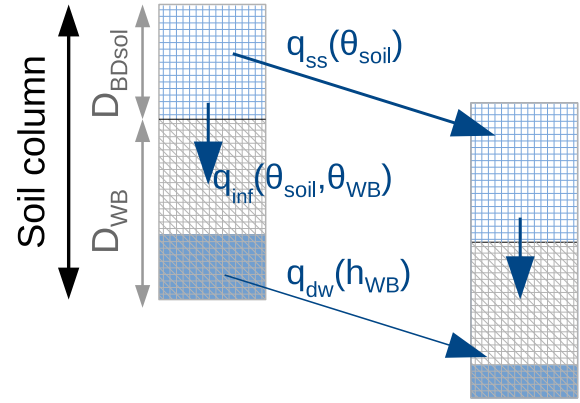

**Figure 5.** SSF and SSF-DWF models: flow generation by the saturation of the upper part of soil column and activation of preferential paths ( $q_{ss}$ ), with support flow at depth ( $q_{dw}$ ), and water exchanges from the upper layer to the lower one according to both soil water content ( $q_{inf}(\theta_{soil}, \theta_{WB})$ ). See equations 2, 3 and 4, for the definition of the flows.

15 uncertainties of modelling  $((\sigma_{mod,i}), i = 1...n)$  (equation 7) and those related to the flow measurements  $((\sigma_{\hat{y}_i}), i = 1...n)$  (equation 8). The choice of DEC is justified by the desire to adapt the evaluation criterion to the modelling objectives (for example, by focusing calibration on reproduction of the rise and peaks of floods in order to be able to forecast flash floods) while always being aware of the uncertainties in the reference flow measurements.

5 Given the lack of information, these uncertainties  $((\sigma_{\hat{y}_i}), i = 1...n)$  were set at 20 % of the measured discharge, which is in line with the literature on discharge measurements from operational stations (Le Coz et al., 2014), and increased linearly with the 10-year hourly discharge, beyond which, as a general rule, the observed flow is no longer measured, but derived by extrapolation from a discharge curve, making it less accurate (equation 8). The envelop  $((\hat{y}_i \pm 2\sigma_{\hat{y}_i}), i = 1...n)$  consequently defines the 95 % confidence interval of the observed flows.

10 The modelling uncertainties  $((\sigma_{mod,i}), i = 1...n)$  were set at a minimum value - as a function of the basic catchment module, thus ensuring that the evaluation of the hydrographs would not be unduly affected by the reproduction of relatively low flows which were strongly dependent on initialisation using previous moisture data that were not the subject of this study. In addition, it was assumed that a modelling uncertainty of 10 % around the confidence interval of observed flows was acceptable (equation 7). Finally, the overall overarching envelop  $((\hat{y}_i \pm 2\sigma_{\hat{y}_i} \pm 2\sigma_{mod,i}), i = 1...n)$  defines hereafter the acceptability zone, that is to say the interval into which any simulated flow would be considered as acceptable, according to the modelling and measurement uncertainty definitions.

$$DEC = \frac{1}{n} \sum_{i=1}^n \epsilon_i^{DEC} = \frac{1}{n} \sum_{i=1}^n \frac{d_i}{\sigma_{mod,i}} \quad (6)$$

$$\sigma_{mod,i} = 0.5 * Q + 0.025 * \hat{y}_i \quad (7)$$

$$\sigma_{\hat{y}_i} = 0.05 * \hat{y}_i * \left(1 + \frac{\hat{y}_i}{Q_{H10}}\right) \quad (8)$$

with  $\epsilon_i^{DEC}$  the DEC modelling error at time  $i$ ;  $\hat{y}_i$  and  $\sigma_{\hat{y}_i}$  the observed discharge and the uncertainty of measurement at time  $i$ ;  
 20  $d_i$  the discharge distance between the model prediction at time  $i$  ( $y_i$ ) and the confidence interval of observed flows ( $\hat{y}_i \pm 2\sigma_{\hat{y}_i}$ );  
 $\sigma_{mod,i}$  the simulated uncertainty at time  $i$ ;  $Q$  and  $Q_{H10}$  respectively the mean inter-annual discharge and the 10-year maximum  
 hourly discharge of the related catchment.

## 4.2 Metrics and key points in model evaluation and comparison

The objective was to evaluate the fit of the models and provide a comparative description of the physical processes represented  
 25 by each model.

Results of the models were firstly assessed and benchmarked using performance scores (section 5.1). The evaluation focused  
 on the performance of the models in reproducing the hydrographs in overall terms, but also, more specifically, on their ability  
 to reproduce the characteristic stages of floods: rising flood waters, high discharges, and flood recession. These stages were  
 defined as follows:

- Rising flood waters: the period between the moment when the observed flow rate exceeded the mean inter-annual dis-  
 charge of the catchment and the date of the first flood peak.
- High discharges: this stage includes the points for which the observed flow was greater than 0.25 times the maximum  
 flow during the event.
- 5 – Flood recession: this stage begins after a period of  $t_c$  (the catchment concentration time according to Bransby's formula  
 (Pilgrim and Cordery, 1992):  $t_c = 21.3 \cdot L / (A^{0.1} \cdot S^{0.2})$ ) after the peak of the flood, and ends when discharge is rising  
 again (or, where appropriate, at the end of the event - the time of peak flooding + 48h).

The Qmed\_INT [%] score (Douinot et al., 2017) was chosen to evaluate the ability of the models to reproduce overall flows,  
 rising flood waters and high discharges. The DEC score has actually provided a standard assessment of the modelling errors  
 10 enabling a reasonable weighting of the simulations. But in order to analyse the results, the Qmed\_INT [%] score is preferred  
 for the easy understanding it provides through its meaningful definition. For the time interval considered, Qmed\_INT defines  
 the percentage of points within the modelling acceptability zone for the median forecast of the calibrated model, with the  
 acceptability zone determined by  $\sigma_{mod}$  et  $\sigma_{\hat{y}}$ .

Conversely, Qmed\_INT was not relevant for the evaluation of the capacity to reproduce recessions, because the calculation  
 15 of this score - based on simulated discharge values - during the recession interval strongly depends on performance at high

discharges. Instead, we used the  $A_{slope}$  score defined in the equation 9. It calculates the average standard error in simulating the decreasing rate of the discharge during the flood recession interval. Through the consideration of the  $A_{slope}$  score here, it is assumed that the recession rate is a relevant feature of the catchment's hydrologic properties (Troch et al., 2013; Kirchner, 2009).

$$20 \quad A_{slope} = \frac{\sum_{i=k}^l \left| \frac{dy_i}{dt} - \frac{d\hat{y}_i}{dt} \right|}{\sum_{i=k}^l \frac{d\hat{y}_i}{dt}} \quad (9)$$

where  $\frac{dy_i}{dt}$  and  $\frac{d\hat{y}_i}{dt}$  are respectively the observed and the simulated recession rates at a time step  $i$  which belongs to the flood recession interval ( $i = k \dots l$ ).

The evaluation was then completed through the description of the modelling errors (section 5.2). The objective was to identify those that were inherent in the choice of model structure, regardless of the calibration methodology adopted. In that respect, attention was paid on the a priori and a posteriori confidence interval of the model simulations respectively defined by  $([y_i^{prior-5th}, y_i^{prior-95th}], i = 1 \dots n)$  and  $([y_i^{DEC-5th}, y_i^{DEC-95th}], i = 1 \dots n)$  where  $y_i^{prior-5th}$  and  $y_i^{prior-95th}$  are the 5<sup>th</sup> and the 95<sup>th</sup> percentile of the 5000 model simulation values at time  $i$ , and where  $y_i^{DEC-5th}$  and  $y_i^{DEC-95th}$  are the 5<sup>th</sup> and the 95<sup>th</sup> percentile of the same but weighted series according to the DEC calibration criterion.

Those confidence intervals were standardized according to the DEC modelling error definition (equation 6), respectively defining the a priori and a posteriori confidence intervals of the modelling errors:

$$\epsilon_i^{\alpha-xth} = \begin{cases} 0 & \text{if } |y_i^{\alpha-xth}| \leq 2 \cdot \sigma_{\hat{y}_i} \\ \frac{y_i^{\alpha-xth} \pm 2 \cdot \sigma_{\hat{y}_i}}{2 \cdot \sigma_{mod_i}} & \text{otherwise } (- \text{ if } y_i^{\alpha-xth} > 0; + \text{ if } y_i^{\alpha-xth} \leq 0) \end{cases} \quad (10)$$

with  $\epsilon_i^{\alpha-xth}$  is the  $x^{th}$  percentile of the  $\alpha$  modelling errors distribution at time  $i$ .

5 The latter definition allows for an informative translation of the prior and posterior confidence intervals (Douinot et al. (2017)): a value of  $\epsilon_i^{\alpha-xth}$  equal to 0 indicates that the  $y_i^{\alpha-xth}$  bound lies within the discharge confidence interval; if  $0 < \epsilon_i^{\alpha-xth} \leq 1$ , the  $y_i^{\alpha-xth}$  bound lies within the acceptability zone; and if  $\epsilon_i^{\alpha-xth}$  is larger than 1 then errors of modelling is detected or remained. In addition, the benchmark of both a priori and a posteriori confidence intervals allows for highlighting which were the remaining modelling errors that were induced by the model's assumptions, and those that were induced by the calibration.

10 For those reasons,  $\epsilon_i^{\alpha-xth}$  were used as the baseline of the modelling errors analysis.

In a third part, the flow processed simulated using the 3 models was assessed and discussed (section 5.3). The objectives were to: i) identify the impact of the choice of a model on the properties of the simulated hydrograph and, ii) assess the relevancy of the modelling results according to the known hydrological behaviours (cf. Section 1.2). In the light of the uncertainty of the flow contributions' assessment, and as the equifinality of the models were emerging in several catchments, the case of the Hérault at Saint Laurent le Minier is detailed. The objectives were to clarify the actual differences induced by the modelled processes and to identify the origins of the models' equifinality.



## 5 Results

### 5.1 Performance of the models

#### 5.1.1 Overall performances of the models

20 **Assessment of the performances by catchment** : Figure 6 shows the average Qmed\_INT scores obtained after calibration of the DWF, SSF and SSF-DWF models for each catchment studied. It also shows the mean and standard deviations obtained from the series of calibration (top) and validation (bottom) events, calculated over all the parts of the hydrographs.

The DWF model assuming deep infiltration and the formation of an aquifer flow in altered bedrocks showed better performance in the Ardèche catchment (#1), while in the Gardon (#2) and the Salz (#4) catchments, the SSF and SSF-DWF models, 25 assuming the formation of subsurface flows due to the activation of preferential flowpaths by local saturation (SSF), and development of flow at depth (SSF-DWF), produced the most accurate results. On the Hérault catchment (#3), the modelling results obtained with each model, in terms of Qmed\_INT, were less obvious, although the SSF-DWF model seemed to stand out to some extent. The differences in model performance were more pronounced for the validation events. The better-performing models tended to be more consistent, with equivalent Qmed\_INT scores on calibration and validation events (for example, 30 the DWF model on the Ardèche (#1) or the SSF and SSF-DWF models on the Gardon (#2). There was also a deterioration in performance in several models that had already been judged less effective (for example, the SSF and SSF-DWF models on the Ardèche (#1), or the SSF model on the two catchments of the Hérault, #3c and #3d).

**SSF model versus SSF-DWF model:** As a reminder, the difference between the SSF and SSF-DWF models is that the latter has an extra calibration parameter -  $C_{kdw}$  - to be able to initialise a significant lateral flow in the subsoil horizons of the soil column (see Equation 3). The lateral hydraulic conductivity in the deep layer is configured using the hydraulic conductivity from BD-sol:  $K_{dw} = C_{kdw} \cdot K_{BDsol}$ , with  $C_{kdw}$  set to  $0.02 \cdot C_{kss}$  in the SSF model and calibrated in the SSF-DWF model. The small differences between the SSF and SSF-DWF models showed that this flexibility does not produce any significant improvement, with the exceptions of the Ardèche catchment at Meyras and the Hérault catchment at Valleraugue. These two 5 areas have a number of common features that could explain the similar modelling results: they are at the heads of high elevation catchments with steep slopes (Table 1), and are subject to considerable annual meteorological forcing. Therefore calibration of the saturation hydraulic conductivity parameter of the subsoil horizon tended to result in a significant flow at depth for these two catchments ( $\frac{1}{C_{kdw}} \in [3, 36]$  for #1d and  $\frac{1}{C_{kdw}} \in [5, 34]$  for #3d, Figure 7, with this ratio set to 50 in the SSF model). In general, the calibration of the  $C_{kdw}$  parameter of the SSF-DWF model (Figure 7) seems to be correlated with the more or less 10 sustained, annual hydrological activity of the catchments: the confidence interval of the  $C_{kdw}$  coefficient is restricted to low values for the catchments with low mean inter-annual discharges (Figure 7, #2a, #2b, #2c, #3a, #3b, #4) and inversely for the catchments with high mean inter-annual discharges (#1, #3c and #3d).

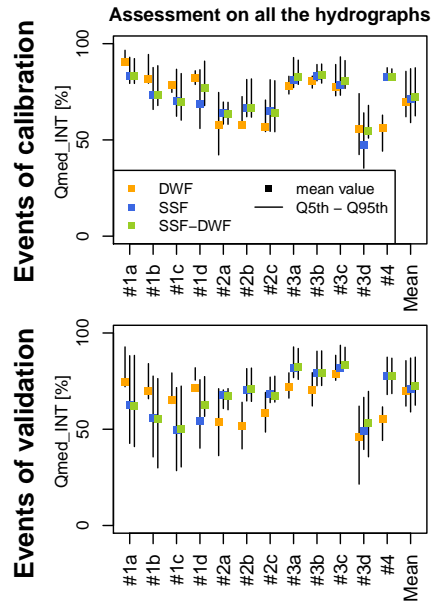

**Figure 6.** Qmed\_INT scores: mean Qmed\_INT scores obtained for the calibration (top) and validation (bottom) events, by model and catchment. The Qmed\_INT scores were calculated for the whole hydrograph. The x axis refers to the ID number of each catchment (Figure 1). Finally, *Mean* attribute refers to the average results over all the catchment obtained with each model.

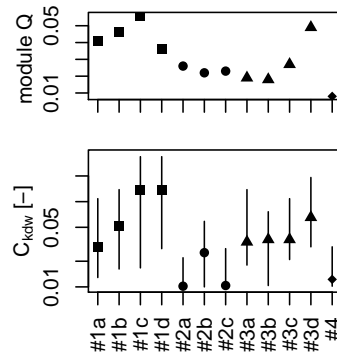

**Figure 7.** Top: Mean inter-annual discharge ( $\text{m}^3 \cdot \text{km}^{-2} \cdot \text{s}^{-1}$ ) for the catchments. Bottom: a posteriori distribution of the calibration of the subsoil horizon hydraulic conductivity in the SSF-DWF model (the  $C_{kdw}$  parameter, Equation 3)

### 5.1.2 Detailed performances: assessment of the models to simulate the different stages of an hydrograph

Figure 8 shows the detailed assessments according to the specific stages of the hydrographs. The objective is to highlight whether the overall performances (Figure 6) reflect uniform results along the hydrographs, or if they actually hide contrasted likelihood of the simulations over the different hydrographs's stages.

Uniform results are observed on the Gardon catchment at Corbes and Anduze (§2a and §2b) and on the Salz catchment (§4): the SSF and SSF-DWF models demonstrated clearly superior performances for all stage-specific assessment on those catchments. For the Gardon catchment at Mialet (§2c), the detailed assessment (Figure 8) shows that the overall superiority of the SSF and SSF-DWF models is mainly due to a better simulation of the rising limb. Nevertheless, for any score, the SSF and SSF-DWF models present either similar or the best modelling results compared to the DWF model.

On the Ardèche catchments (§1a, §1b, §1c, §1d), the overall performances reflect the simulation of the high discharges and of the flood recessions. There, the DWF model gives the best results to simulate those hydrograph's stages. Conversely, it deals slightly less well with the simulation of the rising flood waters. As it would be shown in the section 5.2, all the model tend to underestimate initial flows prior to the event and during the onset of a flood. The DWF model, in particular, exhibits this modelling weakness (see, for example, the onset of floods in the hydrographs for the 18/10/2006 and 01/11/2014 events in Ucel (§1b), Figure 10), which explains the poorer performance. It can be noticed that the SSF-DWF model clearly better simulated the rising flood waters of the Ardèche head watershed (§1d), explaining the overall good performance as well of this model on this catchment (Figure 6).

On the Hérault, the detailed evaluation enabled us to distinguish the performance of the different models. On the one hand, on the 2 larger catchments (§1a and §1b), the DWF model get slightly better performances for rising flood waters simulations, while the SSF model gave more clearly better simulations of the flood recessions. On the other hand the SSF-DWF model generated the best simulations of the rising flood waters and of the high flows on the upstream catchments of La Terrisse (§3c) and Valleraugue (§3d), while the DWF model simulated better flood recession. These contrasted results explained why there is not a specific model that stands out on this catchment. In addition, it suggests a marked influence of the physiographic properties on the development of flow processes because they are correlated with the differences in the geological and topographical properties of the Hérault (§3; see Figure 2 and Table 1). The hydrological behaviours simulated for the Valleraugue and La Terrisse sub-catchments, which are predominantly granitic and schistose, and where slopes are very steep, can be distinguished from those of Laroque and Saint-Laurent-le-Minier, which are mainly sedimentary and in the form of large plateaus.

### 5.1.3 Summary of the assessment

The figure 9 sums up the highlighted models according to the assessed hydrograph's stage. It shows when one's model has a clearly higher performance according to the following definition: A model is assessed as clearly superior when the lower bound of the confidence interval of his score is higher than the median values of the scores obtained with the other models. It reveals that the catchments set might be divided in 4 groups:

- a first group of catchments where the SSF and DWF-SSF models uniformly give either similar or better performances than the DWF models. This is the case for the Gardon (§2) and the Salz (§4) catchments;
- a second group of catchments where the DWF model gives the best results according to all the scores besides the rising flood waters assessment. This is the case for the downstream Ardèche catchments (§1a, §1b, §1c);

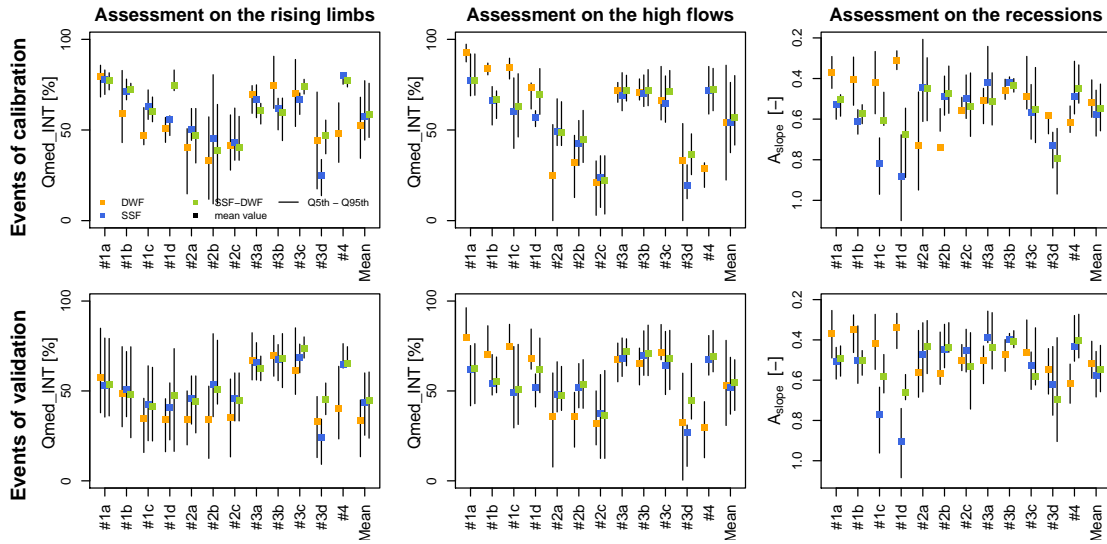

**Figure 8.** Assessment of the models by catchment over the different stages of the hydrographs. Left :  $Q_{med\_INT}$  scores calculated over the rising flood waters stage; center:  $Q_{med\_INT}$  scores calculated over the high discharges stage; right:  $A_{slope}$  scores. High  $Q_{med\_INT}$  scores and conversely low  $A_{slope}$  values indicate good performances of the model.

- a third group where the models’s results are not really discernible. For those catchment, the DWF model appears to slightly simulate better the rising flood and the high discharge, while the recession is better represented by SSF model. This is the case for the downstream Hérault catchments (#3a, #3b);
- a last group where the SSF-DWF model slightly generated better the rising flood and the high discharge, while the recession is better represented by DWF model. In this group are the head watersheds of the Hérault (#3c, #3d) and of the Ardèche (#1d) catchments.

## 5.2 Modelling errors inherent in the models’ structures

For the sake of conciseness, only the simulation of the hydrographs of one catchment is presented. Figure 10 shows the simulation results of the three models over the Ardèche catchment at Ucel (#1b). It shows the simulated hydrographs, and their confidence intervals, compared with observed flows, as well as the inherent errors in the simulations. This highlights the modelling errors due to the choice of model structure (DWF, SSF or SSF-DWF models). When - at a time  $i$  - the a priori confidence interval (grey color) does not cross the acceptability region (green color), it means that no parameter set gives an acceptable simulation, and consequently modelling errors due to the structure - assumptions - of the model is detected. When the posterior confidence interval (salmon color) is outside the acceptability zone, modelling error is remaining. Finally whether the prior (posterior) interval is large or small, the model’s structure allows for reaching a more or less large range of simulated values (the model prediction is more or less uncertain).

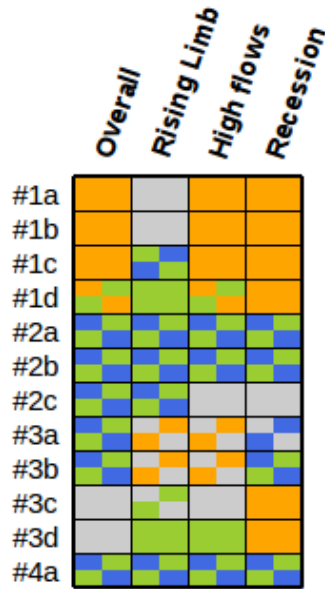

**Figure 9.** Summary of the models's benchmark. A (2) color(s) is (are) attributed for each score and each catchment when one (or two ) models give(s) clearly superior performance: the score of a model is defined as clearly superior when the lower bound of it confidence interval is higher than the median values obtained with the other models. The superiority of a model might be half attributed whether the criteria is only respected for the calibration processes. Color attribution: orange for the DWF model; blue for the SSF model; green for the DWF-SSF model; and grey when the superiority of one's model is undetermined.

Representing the soil column with either one compartment (the DWF model) or two compartments (SSF or SSF-DWF models) leads to distinct a priori confidence interval of modelling errors (grey). The first structure (the DWF model) constrains the simulated flows at the beginning of the event, before the onset of precipitation, because the variation interval of the modelling errors is low at that point. More specifically, it tends to underestimate the initialisation discharges because the variation interval of the errors over this period is predominantly negative. This may explain this model's relative difficulty in reproducing the onset of floods, since the calibration of the parameters did not allow the acceptability zone on this part of the hydrograph to be reached. A resulting interpretation applicable to the catchment sets is that good results in modelling the rising flood waters with the DWF model means that the observed rising flow is relatively slow and could be reached in spite of the restrictive modelling structure.

Likewise, it can be noted that the one-compartment structure (in the DWF model) allows flexibility in the modelling of high discharges and flood recessions, because the confidence interval of the modelling errors is quite large over these periods in the hydrograph. However, it also led to the underestimation of high discharges and flood recessions. In fact, the modelling error interval has a negative bias with respect to the acceptability zone. The calibration finally allows the simulations to be selected, at the intersection of the acceptability zones and a priori confidence in modelling errors. This generally corresponds to the

calibration of a low-depth altered rock  $D_{WB}$ , in order to make the model more sensitive to soil saturation and more responsive, via the generation of early runoff. Consequently, good results in modelling the high flows with the DWF model would suggest  
5 relatively moderate observed runoff that could be reached in spite of the restrictive modelling structure.

Conversely, the two-compartment structure (the SSF and SSF-DWF models) offers flexibility in modelling the beginning of events, flood warnings and high discharges, but the ability to model flood recessions is more constrained. SSF and SSF-DWF models simulate fast flood recession in comparison to the DWF model, suggesting that good results in modelling the flood recession with the SSF model might be interpreted as fast return to normal or low discharge are observed on the related  
10 catchments. As well, the relative position of the modelling-error confidence interval, with respect to the acceptability zone, shows that the structure leads to an unbiased estimate of the onset of a flood, a slight overestimation of high discharges, and an underestimation of flood recessions.

In the SSF and SSF-DWF models, the addition of a flux calibration parameter in the subsoil horizons, not surprisingly, led to wider variations in the a priori modelling errors. A surprising finding, however, is that the calibration of the lateral  
15 conductivity of the deep layer,  $C_{kdw}$ , seems to affect only the simulation at the beginning of the hydrographs (the events of 01/11/2011 and 13/11/2014), and has very little effect on flood recessions.

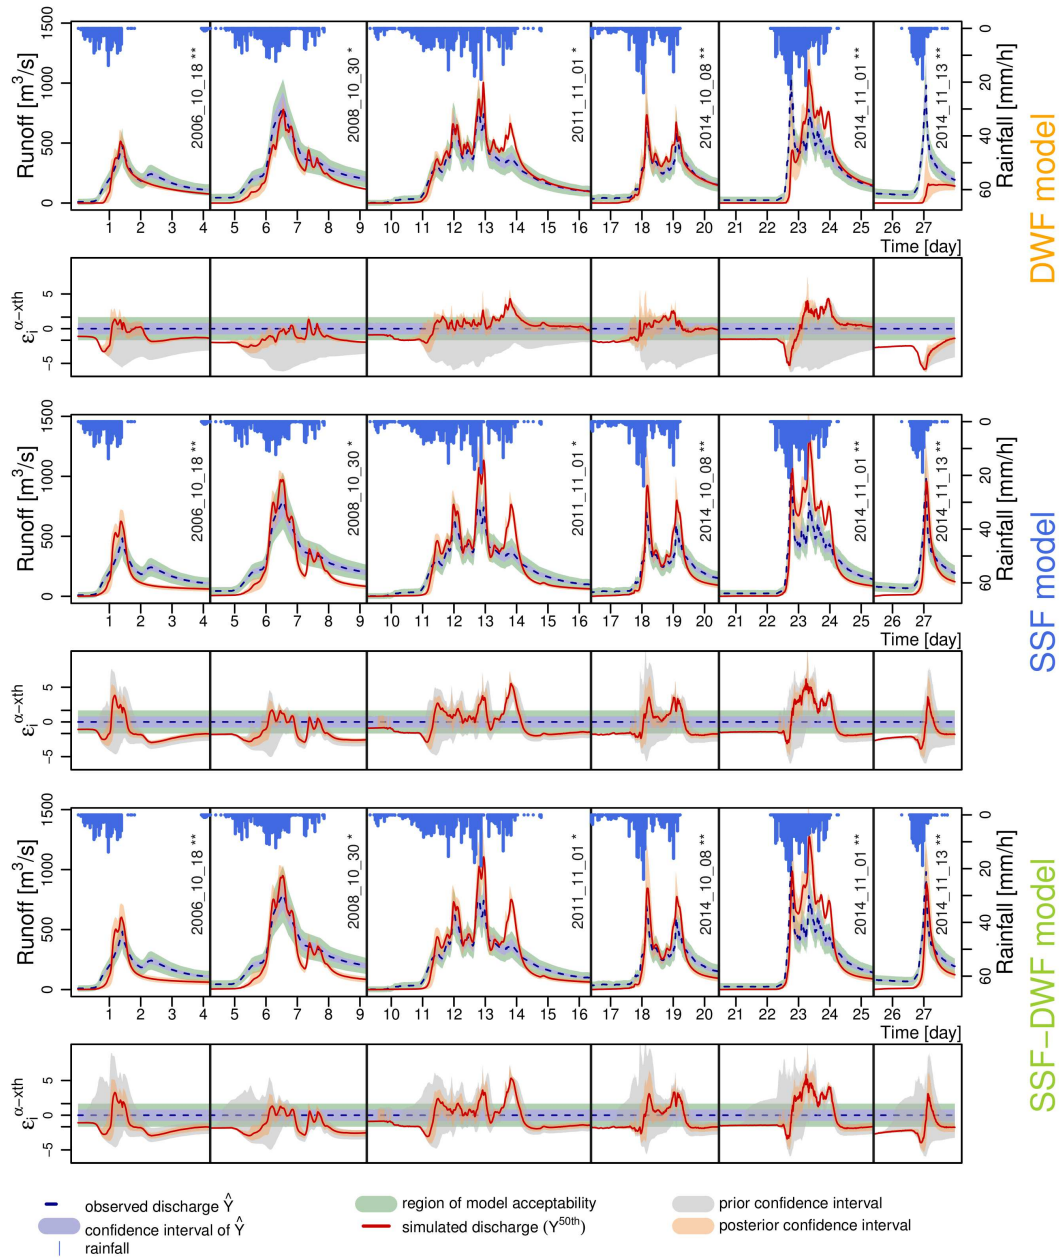

**Figure 10.** Calibration of the three models for the Ardèche catchment at Ucel, #1b). The results of the simulation of five flood hydrographs, and the inherent modelling errors (equation 10) for each model (top: DWF; centre: SSF; bottom: SSF-DWF). The median simulation and the posterior confidence interval are shown, respectively, in red and salmon. The confidence intervals of the measured flows and the acceptability zone are shown, respectively, in green and blue. The a priori confidence interval for each model (i.e. with no calibration) are shown in grey. (\*): event of calibration; (\*\*): event of validation.



## 5.3 Analysis of relevance of the internal hydrological processes simulated

### 5.3.1 Characterisation of the hydrological processes simulated

Each time a model is run it generates its own paths for water flow as it attempts to reproduce the hydrograph. The proportional volumes of the water making up the hydrographs, that arise from the three main simulated paths - on the surface, through the top or through the deep layer of the soil - were calculated. Figure 11 shows the results for the runoff contribution, i.e. the water which has not passed through the soil at any point. The contributions of these surface flows on the whole of the hydrograph (Figure 11, left) and those that support high discharges (Figure 11, right) are distinguished. (Note that the other contributions are not detailed, being correlated to the runoff assessment, and therefore leading to a similar analysis).

**Relationship between the assessment of the flow contributions and the simulated model:** The SSF and SSF-DWF models suggest very similar proportions of subsurface flows, including those at the catchment heads. Calibration of hydraulic properties at depth influences - as intended - only the proportions of subsurface and deep aquifer flows (which are not shown here). The DWF model suggests a larger contribution from runoff to the generation of high discharges, whatever the catchment modelled. In fact, we observed a 15 to 30 % increase in the proportions of surface flow between the DWF model and the SSF and SSF-DWF models.

**Relevancy of the flow contributions deduced from the models' simulations:** The performance of the DWF model was noticeably different on the Gardon (#2) and Salz (#4) catchments, where simulated runoff was much more pronounced over the entire hydrograph. Here, the DWF model showed runoff proportions ranging from 40 to 98 %. However, the few experimental measurements made on the Gardon (Bouvier et al., 2017; Braud et al., 2016a) provide firm evidence on the proportions of new water - i.e. water resulting from meteorological forcing during the event - which range from 20 to 40 % of the volumes in the hydrograph. This clearly points to a lower runoff rate. Even though these experimental results only represent activity in the granitic part of the catchment, they appear to call into question the hydrological functioning suggested by the DWF model. Conversely, the observations lend support to the results obtained by the SSF and SSF-DWF models, where runoff rates were between 19 and 62 %. On the Salz there are no experimental observations available, and, therefore, observed results cannot be corroborated, by the orders of magnitude of the simulated surface flows. Nevertheless, in view of the extremely large runoff proportions suggested by the DWF model, the SSF and SSF-DWF model structures, with more reasonable assessments, appear to be more pertinent for characterising the types of processes occurring.

Considering the most suitable models, revealed in section 5.1, i.e. the DWF model for the Ardèche catchment and the SSF and SSF-DWF models for the Gardons catchment, the runoff contributions to the high flows of the hydrographs appear to be slightly lower on the three downstream Ardèche catchments (#1a, #1b, #1c, with runoff contributions included between 17 and 57 %) compared to the runoff contributions on the Gardon catchment (#2a, #2b, #2c) and on the upstream part of the Ardèche (#1d, with runoff contributions between 20 and 78 %). This point could be brought closer to the properties of the catchments and the rainfall forcing, the first catchment subset (#1a, #1b, #1c) having deeper soil cover, with more permeable soil texture (see table 1), and being forced by rainfall with lower maximal intensities (see table 2) than the second one #2a, #2b, #2c). It

doesn't validate the estimation done, but it clearly suggests that the assessment of the flow contributions through the most suitable model's simulations for each catchment are consistent with each other.

On the downstream catchments of the Hérault (#3a, #3b), it can be noted that the range of variation of the surface flows estimated by the three models overlap. It may explain why the three models can achieve good reproductions of the hydrological signal - in that the calibration step makes it possible, from an integrated point of view - to obtain an analogous distribution of the flows processes.

### Capacities of the models to give an assessment of the internal flow contributions:

Notwithstanding the uncertainty related to the model's choice when any model has been identified most suitable through the performances, it can be noticed that the large uncertainties are related to the parameterization of the models, a consequence of the equifinality of the solutions when calibrating a hydrological model against the sole criterion of the reproduction of the hydrological signal. While, in terms of plausibility, several sets of parameters may be equivalent, even for the same model, these sets of parameters are likely to lead to different hydrological functioning. This is especially the case for the DWF model, for which the relative proportions of processes simulated depend on the choice of  $D_{WB}$ .

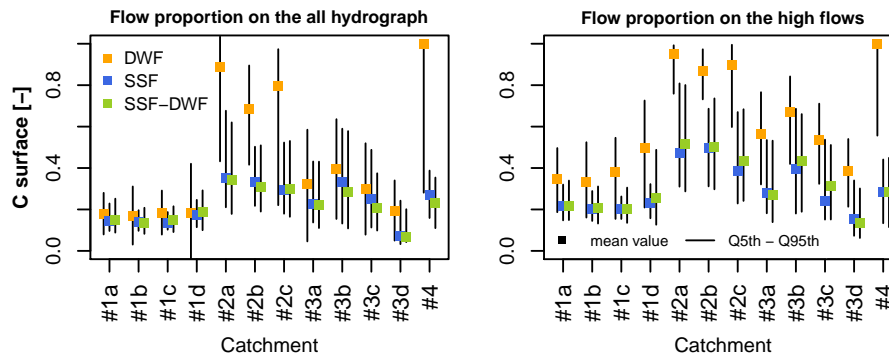

**Figure 11.** Proportion of surface runoff in the flows at the outlet. Left: The proportion over the whole hydrograph; right: the proportion at high discharges (Observed flow greater than 0.25 times the maximum flow during the event).

### 5.3.2 Detailed study of four plausible simulations on the Hérault watershed at Saint Laurent-le-Minier

In order to better understand the different impacts behind the hypotheses on which the models are based, but also to explain the resulting uncertainty when assessing the flow processes distribution, other variables, such as (spatialised and integrated) changes in moisture levels in the catchments or the flow velocities generated by modelling choices, have to be considered. Next, we describe the detailed results of four simulations, also considered to be plausible according to the DEC criterion, obtained from the DWF and SSF models as well as four sets of parameters (see Table 3). We considered the Hérault catchment at Saint-Laurent-le-Minier (#3b) because the criteria previously used had not shown any one model to be more representative. The objective was to highlight how the models differed in terms of flow development, and what compensations occurred between processes to allow the equifinality of solutions.

**Table 3.** Realistic models and parameter sets for the Hérault catchment at Saint-Laurent-le-Minier (#3b).  $C_{soil}$ : the contribution to the hydrograph of flows passing through the soil ;  $C_{kdw}/C_{kss}^*$  : the value of the parameter  $C_{kdw}$  for model DWF (Equation 1) or the value of the parameter  $C_{kss}^*$  for the model SSF (Equation 2).

| ID   | NSE  | $D_{WB}[m]$ | $C_k[-]$ | $C_{kdw}/C_{kss}^*[-]$ | $n_r[-]$ | $n_p[-]$ | $C_{soil}[\%]$ |
|------|------|-------------|----------|------------------------|----------|----------|----------------|
| DWF1 | 0.82 | 0.15        | 17.3     | 8711                   | 19.6     | 19.11    | 61             |
| DWF2 | 0.84 | 0.11        | 2.34     | 4416                   | 19.16    | 7.63     | 39             |
| SSF1 | 0.89 | 0.40        | 15.81    | 45284                  | 15.96    | 5.86     | 68             |
| SSF2 | 0.89 | 0.34        | 2.08     | 22543                  | 14.06    | 6.42     | 53             |

The figure 12 compares the changes over time in the state of soil saturation and the different simulated flow velocities of four “model + parameter set” configurations (Table 3). Figure 13 compares the spatial distributions of these variables, at a given moment, as an example.

20 In terms of hydrographs, quite logically given the similar likelihood scores, the simulations differ very little. Overall, the DWF1 configuration anticipate flood peaks; the DWF model (in the DWF1 and DWF2 configurations) generated greater flows at the end of rain episodes; and these same configurations result in a slight underestimation of peaks for floods of average intensity (18/10/2009 and 05/03/2013) and, conversely, an overestimation of the peaks for exceptional floods (12/03/2011 and 01/11/2011), compared with the SSF model (in the SSF1 and SSF2 configurations).

The notable difference in the generation of hydrographs is the contribution of the different simulated flowpaths. The proportions of water passing through the soil column (via sub or surface-soil horizons) are highly variable: with an average of 39 % for the DWF2 model, 53 % for the SSF2 model, 61 % for the DWF1 model and 68 % for the SSF1 model. This is due both to the structural choices (DWF and SSF) which involve a saturation dynamic and the incorporation of different types of flow, and  
5 the choice of the parameters which involves flow velocities of differing orders of magnitude.

Figure 12-b) shows the different saturation dynamics involved in the DWF and SSF structures. The DWF structure entails continuous drainage of the catchment, including at initialisation. This results in a noticeable continuous decrease in the water content of the soil, including at the beginning of an event, which slows down saturation during the onset of flooding. In contrast, the overall soil water content of the soil profile (solid line) from the catchment simulated by the SSF model are distinguished  
10 by a gradual decrease towards a state of equilibrium. Taking Figure 13 (the left-hand column), we can also observe differences in spatial dynamics. The DWF model produces a greater contrast in saturation levels between different areas of the catchment. This results from the decrease in the simulated flows as a function of water height (cf. Section 3.2, Equation 1), which makes the draining of each grid cell sensitive to spatial distribution of the soil depth. With the SSF model, the overall catchment saturation levels appear to be more related to the topography: we observe saturation of the cells close to the drainage network,  
15 and, conversely, lower water content in the upper reaches of the catchments. In fact, for the SSF model, rainfall forcing is mainly involved in saturation of the upper soil layer (the dashed lines in Figure 12-b), which reacts very rapidly to precipitation.

The flow velocities simulated in the soil (Figure 12-c) are linked to the saturation dynamics. At the start of flooding, the SSF structure results in an early increase in flow velocities due to a higher saturation level of the upper soil layer. Moreover, the flow model chosen and fixing of the parameter  $m_\theta$  to simulate the activation of preferential paths in the SSF model (Equation 2 allows a much greater variation of simulated velocities over the short period during which the watershed is saturated. Conversely, for the DWF model, the variation interval of simulated velocities is two to four times lower, and the reaction to changes in soil moisture appears to be more linear. The choice of parameters - in particular  $C_{kss}$ , here - influences the order of magnitude of the simulated velocities but not the evolution over time, which depends on the structure of the model (the flow modelling equation and the representation of one or two compartments).

The spatial distributions of the flow velocities in the soil (Figure 13, centre) shows similarities with the areas affected by the flows. For the four configurations, the development of flows in the soil only partially reflects the state of saturation, but it is correlated with the physiographic properties of the soil (topography and thickness) and the spatial distribution of meteorological forcing. The different orders of magnitude in the simulated velocities reflect the calibrations of the  $C_{kss}/C_{kdw}$  parameters in the four configurations.

The simulated runoff velocities in the catchment area (Figure 12-d) differs only by their order of magnitude, their evolution being similar. The order of magnitude of the runoff velocities is mainly due to the number of grid cells in the catchment with excess infiltration. It reflects the influence of the infiltration control parameter,  $C_k$ , and the depth of the subsoil horizon,  $D_{WB}$ . At the end of the event, we note the presence of average, non-zero runoff rates on the catchments with the DWF model, a consequence of grid cells that are still saturated.

The spatial distributions of the flow velocities on the catchments (Figure 13, right) show the two types of functioning suggested by the four proposed configurations. Either the runoff is generated by exceeding the storage capacity of the soil; this is the case for configurations DWF1 and SSF1, where the grid cells with non-zero runoff velocities correspond to the grid cells where the saturation state of the soil column has been reached, or, runoff is generated by exceeding the infiltration capacity of the soil; this is the case for configurations DWF2 and SSF2 for which the coefficient  $C_k$ , set at a low value (cf. Table 3), limits infiltration.

The changes in runoff velocities in the drainage network (Figure 12-e) reflect the soil saturation dynamics (Figure 12-b). For the SSF model, an early increase in velocities in the drainage network is observed; this is due to the fast saturation of the upper compartment of the soil column, producing consequently interflows through activation of preferential flow paths at the beginning of the event. The DWF model yields a more contrasting variation in the runoff velocities in the drainage network, mirroring variations in soil saturation levels. Finally, it can again be noted that only the structure of the model influences the evolution over time of flows in the drainage network, whereas the choice of parameters - particularly, here,  $n_r$  and  $n_p$  - affects the order of magnitude of the simulated velocities.

Taking the example of the four configurations, the selection of plausible parameter sets appears to show a correlation between the parameters  $C_k$ , and  $n_r$  and  $n_p$ . This is actually a general results of the models calibration. There are high values of the Pearson correlation coefficient, especially for the Gardon catchment at Anduze (#2a):  $\rho_{DWF} = 0.46$  and  $\rho_{SSF} = 0.18$ . This shows the necessity of slowing down flows in the drainage network when a larger proportion of runoff from the catchments

is simulated (i.e.  $C_k$  is low). In all cases, where the values of  $C_k$  are low, the transit flows through the ground are also slower (i.e. the values of  $C_{kss}$ ,  $C_{kdw}$  were low). Thus, as a result of the model calibration, a degree of compensation occurs in the simulated transfer times between the various water paths, from the hillslopes to the drainage network, and from the drainage network towards the outlet.

## 6 Discussion

### 6.1 On the hydrological functioning of the catchments studied

The benchmark of the models's performance on the catchment set leads to reveal 4 subsets, suggesting 4 distinct hydrological behaviours. According to the modelling assumptions (Section 5.1), the resulting constraints in simulating the different stages of the hydrographs (Section 5.2), and according to the catchment properties (Section 2.1), the hydrological behaviour of the catchment can be interpreted subset by subset as follow:

- The SSF and SSF-DWF models shows better overall performance (with no particular pattern) in the first subset : the Gardon (#2) and Salz (#4) catchments. This suggests, on the one hand, rapid catchment reactivity with fast rising flood waters as well as fast flood recession, and on the other, formation of the flows in the soil through local saturation tied to the climate forcing. Although the models exhibit similar performances, the contrasting physiographic characteristics of these catchments suggest that there are different explanations for this better fit of the SSF-DWF model. On the Gardon, the very high intensities of the observed events (Table 2) and/or the low soil depth (Table 1) may explain the limitations on vertical infiltration due to the properties of the soil and/or geological bedrock; as a result, the rapid formation of a saturated zone at the top of the soil column, favours runoff and subsurface flux by activating preferential paths in the soil. This interpretation is in agreements with the field studies achieved on a shist upstream sub-catchment of the Gardon, the shist substratum being the predominantly geology of the Gardon catchment (see section 2.1, Ayrat et al. (2005); Maréchal et al. (2009, 2013)). On the Salz (#4), the soil is deeper and the precipitation intensities lower. On the other hand, the geological bedrock composed of marls, sandstone and limestone is assumed to have low permeability and the soil is less conductive due to its predominantly silt-loam texture. As a result, despite the lower forcing intensities, the surface soil can reach saturation, which might explain why the SSF model offers the best fit.
- The considerable hydrological responses, in terms of volumes, on the Ardèche second subset, appear to be linked to hydrological activity at depth, including that taking place during intense floods, as suggested by the better fit of the DWF model. Here, in particular, the model gives a better representation of the relatively slow and uniform hydrological recessions from one event to the next, reflecting an aquifer-type flow whose discharge properties are governed by the properties of the catchment bedrock only. Again, this interpretation is enforced by the field studies achieved this time in a granite experimental sub-catchment localised in the downstream part of the Gardon (Section 2.1, Ayrat et al. (2005); Maréchal et al. (2009, 2013)), the Ardèche catchment being granitic. The somewhat delayed flood timing that the structure of the one-compartment model imposes seems to indicate that there are more rapid flows at the beginning of an

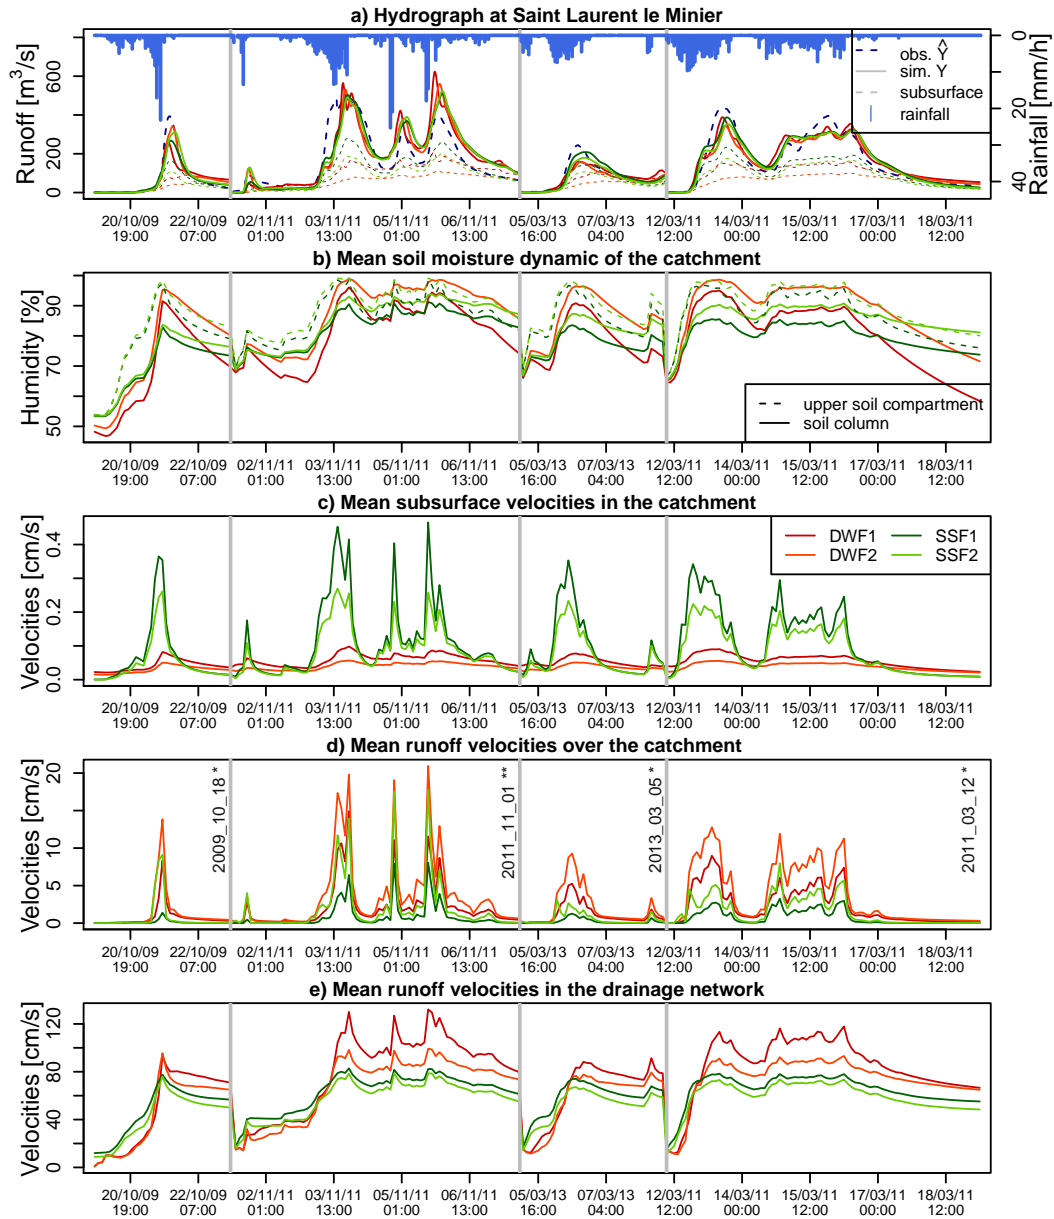

**Figure 12.** Comparison of the results of four equally plausible simulations on the Hérault at Saint Laurent le Minier (Table 3). a) Flood hydrographs (solid lines) and outlet flows transiting via the soil (dashed lines). b) Evolution in the overall moisture content of the soil column. c) Evolution in simulated mean velocities in the subsoil horizon (DWF model) and in the upper part of the soil column (SSF model). d) Average runoff velocities on the hillslopes. e) Average runoff velocities in the drainage network. (\*): event of calibration; (\*\*): event of validation.



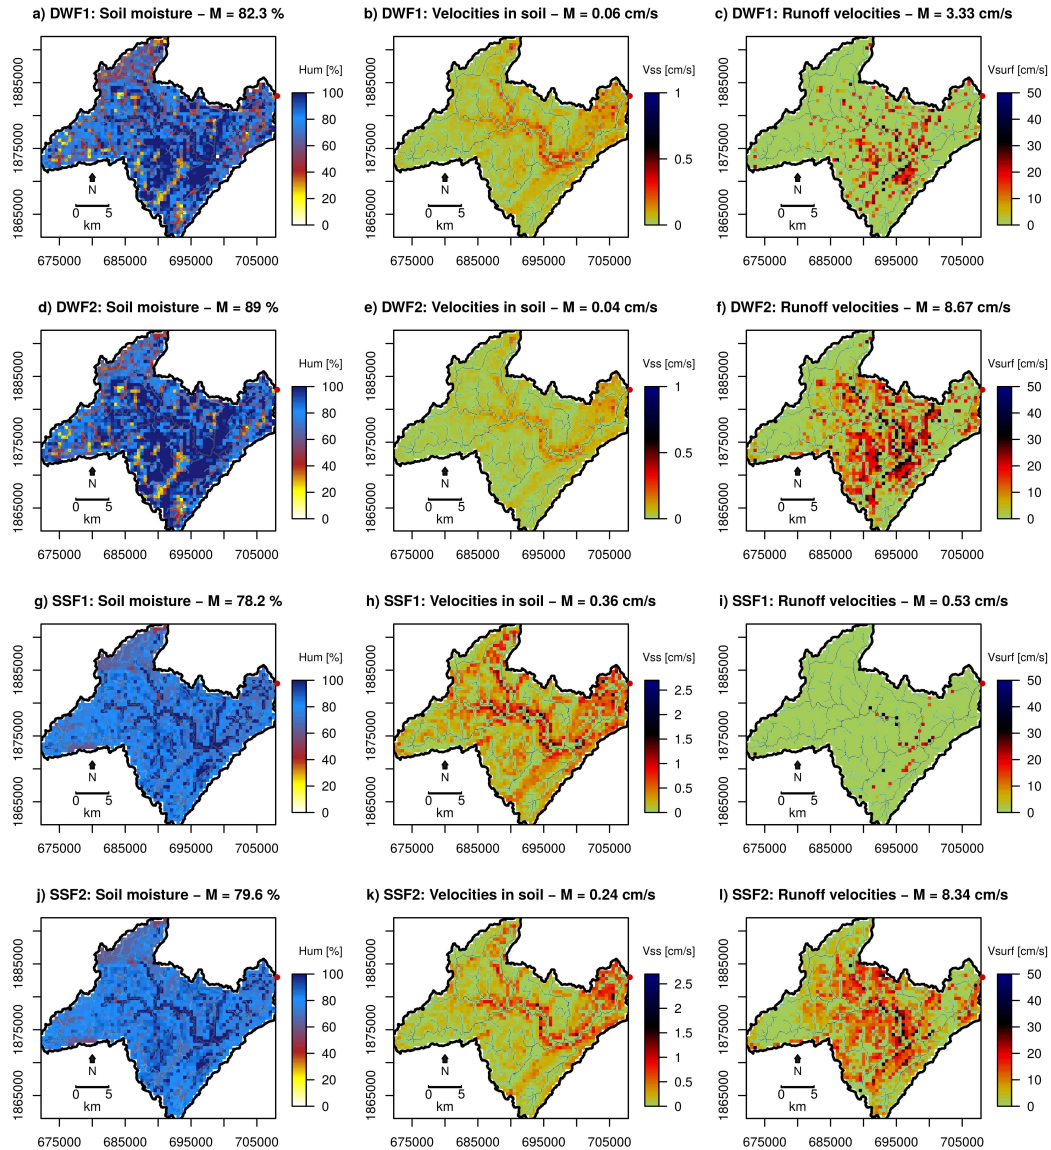

**Figure 13.** Spatialised outputs for a given moment during the event of 18/10/2009 (during the development of the flood, where  $Q = 74 \text{ m}^3 \cdot \text{s}^{-1}$ ): a-d-g-j) soil moisture conditions simulated, respectively, by the configurations DWF1, DWF2, SSF1, SSF2; b-e-h-k) discharges in the soil simulated, respectively, by the configurations DWF1, DWF2, SSF1, SSF2 (N.B: different colour scheme); c-f-i-l) surface flow velocities simulated, respectively, by the configurations DWF1, DWF2, SSF1, SSF2.

15

event, which this model structure is not able to represent. An initial explanation for this may lie in the design of the model: the drainage network being structured into  $1 \text{ km}^2$  drained areas. The comparison with the observed hydrographic network for the catchment showed an under-representation of the upstream drainage network, which may have resulted



in a delay in the modelling of the signal, despite the model offering a good overall fit. A second possible explanation is the default calibration, which uses a uniform depth of active subsoil horizons,  $D_{WB}$ , during a flood. This might mask the appearance of local saturation zones, and the subsequent runoff due to shallow soil and discontinuities in the permeable base layer (for example, in the downstream sedimentary layers, where infiltration tests have shown the appearance of runoff, see Section 2.1). In contrast, the SSF and SSF-DWF models do not display this weakness because the varying nature of soil depths ( $D_{BDsol}$ , which determines the depth of the upper compartment) allows the rapid development of flows via preferential paths in the soil blocks, thus enabling the simulation of such local dynamics.

- The third subset consists in the downstream part of the Hérault (§3a, §3b). The models's performances contrast with the Hérault catchment heads (§3c, §3d), suggesting a hydrological behaviours related to the contrasted geological properties. An interpretation of hydrological functioning is nevertheless not possible, given the good overall results offered by other models and that no distinctions can be drawn according to other criteria, such as performance in terms of the simulation of flood recession, for example.
- The last subset consists in the catchment heads (§1d, §3c, and §3d). We observe superior performances from the DWF and SSF-DWF models, with a particular improvement in the forecasting of rising flood waters when using the SSF-DWF model. This suggests the presence of several types of flow in the soil with strong support from flows at depth, which corroborates the high mean inter-annual discharges associated with these catchments, and additionally the presence of rapidly formed flows, providing a good simulation of the rising flood waters. It should be noted that, here again, modelling the drainage network for an area greater than that observed on these steep-sloped catchments can also affect the results.

## 6.2 On the uncertainty of the flow contribution assessment / On the equifinality issue

The section 5.3.2 gives a benchmark of modelling configurations, scanning the different simulated processes. While the configurations presents comparable likelihood In this comparison of the simulated processes, the equivalence of the configurations, presented in terms of integrated modelling of the flow at the outlet, the equivalence is refuted by the differences generated in:

- the proportions of water passing through the ground or over the surface, linked to the infiltration control mechanism, governed here by the chosen configuration.
- the saturation dynamics of the soil, which are linked to the flows developed in the soil, governed here by the structure of the chosen model.
- the orders of magnitude of the simulated flow velocities, which are related to both the choice of the model structure and the parametrization.

A detailed description of the configurations, together with an estimation of the structural errors in the modelling, allows better visualisation of what the different hypotheses of hydrological functioning involve, and points to new options for constraining models, as well as the potential contributions from new knowledge/observations:

- The DWF and SSF structures generate vertical dynamics and distinct spatial saturation patterns. The current availability of high-resolution telemetry measurements with high spatial coverage (for example, Sentinel-1-based satellite Earth Observation data (Enenkel et al., 2016; Cenci et al., 2017)) offers the opportunity to conduct a qualitative assessment of soil moisture patterns. The temporal resolution (up to six days) is not adapted to flash-flood time scales and prevents their use for real-time evaluation of hydrological simulations. However, observing some saturation patterns for a number of events during, or shortly after, an episode would provide an interesting research avenue, in terms of distinguishing the hydrological reactions of the catchments in a spatialised manner, which could help confirm the accuracy of the models tested.
- The different flow proportions related to the structure of the model selected (use of the DWF model tends to result in more runoff on slopes) and its calibration emerge as new objectives for constraints, because they imply distinct hydrological behaviours. Tracing flows via isotopic measurements is not suited to the meso-scale catchments studied, nor to the spatial representation of the MARINE model, which assumes an instantaneous and complete mixing of the water volume and does not calculate residence times (McDonnell and Beven, 2014). Conversely, the use of an indicator of the presence of runoff, such as diatom tracing (Pfister et al., 2017b), suspended particles or the turbidity of water, offers an indirect means of detecting the degree of surface flows in a flood, and could make it possible to better constrain the partitioning of the hydrographs.
- The different proportions in the simulated flows are allowed by the simulation of transfer times, of varying length, on the different water paths: runoff, flows through the soil, and via the drainage network. These arise, in particular, as a result of the calibration of flow velocities having different orders of magnitude. It would be difficult to envisage a constraint on the orders of magnitude of the simulated velocities because the scale of modelling (where, as a reminder,  $dx$  100 m) encompasses macrostructures (for example, preferential paths) that cannot be quantified without detailed analysis. Conversely, separate optimisation of the drainage network, and the parameters that control flow on the hillslopes, would limit the possible compensations between the transfer times modelled. In particular, intermediate hydrometric stations could be used to calibrate the transfer function of the hydrological signal from the drainage network to the outlet.
- Finally, the evaluation based on the ability of the simulations to reproduce the characteristic stages of floods demonstrates the greater impact of the choice of model structure on the rise and recession of floods. They, therefore, point the way towards an optimal consideration of these parts of the hydrograph. The choice of an evaluation score based on a comparison of time series proved pertinent as a result of its sensitivity at the onset of a flood. The uncertainty in flow measurements was systematically taken into account for all catchments. In order to refine the information on the measured flows (and, more precisely, the average range of flows for rising and receding floods), it would make sense to carry out specific calculations for each hydrometric station and its associated discharge curves (using the Baratin Method (Le Coz et al., 2014), for example).

## 7 Conclusions and Perspectives

### 20 7.1 Summary of the study's objectives and methodology

The objective of the study was to improve our understanding of flash flooding on the French Mediterranean Arc. In particular, attention was paid to the dynamics of soil saturation in catchments during these events, and their possible relationship with the physiographic diversity encountered. The method used consisted in considering hydrological models as a diagnostic tool to test hypotheses about the functioning of catchments.

25 Based on the structure of the MARINE model - a hydrological model with a physical and distributed basis - three types of dynamic of soil saturation were postulated and tested. In the first case (the DWF model), we assumed an aquifer dynamic, with infiltration at depth, and the generation of strong base support, according to the volume of infiltrated water; in the second case (the SSF model), it was the activation of preferential paths at the soil/altered rock interface that generated the majority of the flows passing through the soil, with the lower part of the soil column serving only as a storage reservoir; and in the third case  
30 (the SSF-DWF model), there was flow generation via both the activation of preferential pathways, initially by saturation of the top of the soil column, and a significant increase in the base flux via the subsequent infiltration of water present at deeper levels.

The same calibration strategy was used for the three models on a set of 12 catchments which are representative of the diverse characteristics of the Mediterranean Arc. Whether a model offers a good fit was evaluated on the basis of: scores representing overall, or partial model performance in terms of simulating the hydrographs; the proportions of the processes simulated; and the timing and form of flood recession.

### 7.2 Conclusions on our understanding of the processes involved

5 From the application and validation of the three hydrological models, the 12 catchments of the study could be classified into four categories: i) the Gardon and Salz catchments, for which the SSF model is better suited to reproducing the hydrological signal. For these catchments, this highlights the importance of local and surface soil dynamics in the generation of flows, especially at the beginning of a flood; (ii) the Ardèche catchments, for which the DWF model most accurately reproduce the observed flows. This indicates more regular and integrated hydrological functioning at the catchment level, with the flows  
10 generated being directly related to the moisture history and rainfall volumes; (iii) the Hérault catchments at Valleraugue and La Terrisse, and the Ardèche catchment at Meyras, which have steep-sloped catchment heads, where the SSF-DWF model stands out, suggesting both sustained and significant hydrological activity at depth during flash floods, and surface activity in the establishment of early flows at the beginning of events; (iv) the Hérault catchments at Laroque and Saint-Laurent-le-Minier, for which no model shows any significant difference.

15 The modelling results help to draw consistent assumptions on hydrological behaviours, which corroborate when available, the knowledge and observations on the overall hydrological functioning of the catchments, or the experimental estimations of flow processes. The results suggest that the behaviour of catchments under extreme forcing is a continuation of the hydrological functioning normally encountered. Several earlier studies have pointed to a potential correspondence between hydrological

functioning and the nature of the geological bedrock. This is in evidence on the Hérault, where the evaluation of the three  
20 models highlighted different hydrological behaviours which are linked to differences in the geological nature of the catchments.  
Also, the Gardon and Ardèche catchments, which have respectively mainly schistose and granitic geology, exhibited different  
behaviours, in correspondance with the field experimental studies of the region. On the other hand, the similar hydrological  
behaviours of the Gardon and the sedimentary Salz catchment are quite surprising owing to their contrasted geological and  
other physiographical properties. These results, however, did not contradict the earlier studies, which suggest a relationship  
25 between storage capacity in the substratum and the nature of the geological bedrock, while the similarity highlighted here  
concern the formation of flows in the soil.

Another objective of the study, was the assessment of the flow processes. Owing to the equifinality issues, the assessment  
remains uncertain. Nevertheless, the analysis of the internal processes highlighted the compensation between the flow processes  
simulated - in the drainage network and in the hillslope - that is made possible through a wide range of flow velocities simulated,  
30 as being the main reason of the equifinality issue. The detailed description enables finally to propose new strategies for a better  
constraint of the models.

Lastly, identifying the most pertinent hydrological models for each catchment enables the key elements in the generation  
of flash floods to be highlighted, which, in turn, could serve to further develop methods for forecasting flash floods. For  
example, distinctions in hydrological behaviour revealed between the catchments of the Gardon and the Ardèche - the first  
one appearing more reactive with important runoff and subsurface flows through preferential flowpaths - might shift towards  
different considerations when setting up a flash flood forecasting method over those contrasted area. It corroborates the results  
of Douinot et al. (2016) which highlighted contrasted impacts of taking into account the spatial variability of precipitation in a  
flash flood forecasting method. These contrasted impacts can indeed be explained by the more pronounced spatial variability  
5 of the rainfall over the Gardon catchment, but also by the local dynamic of the soil water content of the Gardon catchment  
revealed in the present study.

### **7.3 Conclusions about the method used**

The use of the hydrological model as a diagnostic tool allowed the classification of the catchments studied. It also contributes to  
the overall knowledge of these catchments in order to improve understanding of hydrological functioning during flash floods.  
10 The study also demonstrates: i) the complementarity of field observations in the interpretation of results, ii) the limitations  
in the evaluation and drawing of distinctions between models when constrained solely on the basis of the reproduction of  
an integrated response; and iii) the contribution that an analysis of equally performing parameter sets and possible model  
functioning can make to guide the choice of new and better constraints, and the strategic observations that need to be made  
in order to differentiate between equally plausible models. Lastly, distinguishing between models based on the evolution of  
15 internal variables - flow velocities and soil saturation states - makes it possible to highlight the value added by the descriptive  
potential of a distributed model with a physical basis, such as MARINE.

*Competing interests.* The authors declare that they have no conflict of interest.

*Acknowledgements.* This work was partly funded by the Eurorégion Pyrénées-Méditerranée (PGRI-EPM project) and the French central service for flood forecasting (SCHAPI).

## 20 References

- Anquetin, S., Braud, I., Vannier, O., Viallet, P., Boudevillain, B., Creutin, J.-D., and Manus, C.: Sensitivity of the hydrological response to the variability of rainfall fields and soils for the Gard 2002 flash-flood event, *Journal of Hydrology*, 394, 134 – 147, <https://doi.org/10.1016/j.jhydrol.2010.07.002>, flash Floods: Observations and Analysis of Hydrometeorological Controls, 2010.
- Arnaud, P., Lavabre, J., and Masson, J.: Amélioration des performances d'un modèle stochastique de génération de hyétogrammes horaires: application au pourtour méditerranéen français. (Improving the performances of a hourly time step stochastic model: case of the French Mediterranean area), *Revue des sciences de l'eau/Journal of Water Science*, 12, 251–271, <https://doi.org/10.7202/705351ar>, <http://id.erudit.org/iderudit/705351ar>, 1999.
- Ayral, P.-A., Sauvagnargues-Lesage, S., and Bressand, F.: Contribution à la spatialisation du modèle opérationnel de prévision des crues éclair ALTHAÏR.(Contribution to the spatial distribution of the operational flash flood forecasting model ALTHAÏR), *Etude de géographie physique*, 32, 75–97, 2005.
- Badoche-Jacquet, G., Blanchet, F., and Blanchet, B.: Procédé et dispositif pour l'évaluation des précipitations sur une zone de terrain. (Procedure and apparatus for evaluating field precipitation), Patent EP0578544B1, p. Rhea, 1992.
- Borga, M., Gaume, E., Creutin, J. D., and Marchi, L.: Surveying flash floods: gauging the ungauged extremes, *Hydrological processes*, 22, 3883, <https://doi.org/10.1002/hyp.7111>, 2008.
- Borga, M., Stoffel, M., Marchi, L., Marra, F., and Jakob, M.: Hydrogeomorphic response to extreme rainfall in headwater systems: flash floods and debris flows, *Journal of Hydrology*, 518, 194–205, <https://doi.org/10.1016/j.jhydrol.2014.05.022>, 2014.
- Bouvier, C., Patris, N., Freydie, R., Guilhe-Batiot, C., Seidel, J.-L., Taupin, J.-D., Brunet, P., and Remes, A.: The Floodscale Experiment at the Hillslope Scale: Physico-Chemical Characterization of Runoff Contributing to Flash Flood Generation in the Small Catchment of Valescure, France, in: 10th HyMeX workshop 4-7 July 2017, Barcelona, Spain, 2017.
- Braud, I. and Vandervaere, J. P.: Analysis of infiltration tests performed in the Claduègne catchment in May-June 2012, contribution to WP3.4 “Documentation and mapping of soil hydraulic properties, soil geometry and vegetation cover of small catchments”, Tech. Rep. 66, FloodScale (2012-2016) ANR project, <http://mistrals.sedoo.fr/?editDatsId=1321>, 2015.
- Braud, I., Ayral, P., Bouvier, C., Branger, F., Delrieu, G., Le Coz, J., Nord, G., Vandervaere, J., Anquetin, S., Adamovic, M., Andrieu, J., Batiot, C., Boudevillain, B., Brunet, P., Carreau, J., Confoland, A., F. D. L. J., Domergue, J., Douvinet, J., Dramais, G., Freydie, R., Gérard, S., Huza, J., Leblois, E., Le Bourgeois, O., Le Boursicaud, R., Marchand, P., Martin, P., Nottale, L., Patris, N., Renard, B., Seidel, J., Taupin, J., Vannier, O., Vincendon, B., and Wijbrans, A.: Multi-scale hydrometeorological observation and modelling for flash-flood understanding, *Hydrology and Earth System Sciences*, 18, 3733–3761, <https://doi.org/10.5194/hess-18-3733-2014>, 2014.
- Braud, I., Andrieu, H., Ayral, P.-A., Bouvier, C., Branger, F., Carreau, J., Delrieu, G., Douvinet, J., R., F., E., L., Le Coz, J., Martin, H., Nord, G., Patris, N., S., P., Renard, B., Seidel, J.-L., and Vandervaere, J.: FloodScale : Observation et modélisation hydro-météorologique multi-échelles pour la compréhension et la simulation des crues éclairs. Multi-scale hydrometeorological observation and modelling for flash-flood understanding., final report of the projet ANR-2011 BS56 027 01, 2016a.
- Braud, I., Ayral, P., Bouvier, C., Branger, F., Delrieu, G., Dramais, G., Le Coz, J., Leblois, E., Nord, G., and Vandervaere, J.: Advances in flash floods understanding and modelling derived from the FloodScale project in south-east France, in: 3rd European Conference on Flood Risk Management, Innovation, Implementation, Integration (FLOODrisk 2016), vol. 7, p. 04005, Lyon, France, <https://doi.org/10.1051/e3sconf/20160704005>, FLOODrisk 2016, 3rd European Conference on Flood Risk Management, Innovation, Implementation, Integration, Lyon, FRA, 18-/10/2016 - 20/10/2016, 2016b.

- 20 Buytaert, W. and Beven, K.: Models as multiple working hypotheses: hydrological simulation of tropical alpine wetlands, *Hydrological Processes*, 25, 1784–1799, <https://doi.org/10.1002/hyp.7936>, 2011.
- Camarasa-Belmonte, A. M.: Flash floods in Mediterranean ephemeral streams in Valencia Region (Spain), *Journal of Hydrology*, 541, 99 – 115, <https://doi.org/10.1016/j.jhydrol.2016.03.019>, flash floods, hydro-geomorphic response and risk management, 2016.
- Cassardo, C., Balsamo, G. P., Cacciamani, C., Cesari, D., Paccagnella, T., and Pelosini, R.: Impact of soil surface moisture initialization on rainfall in a limited area model: a case study of the 1995 South Ticino flash flood, *Hydrological Processes*, 16, 1301–1317, <https://doi.org/10.1002/hyp.1063>, 2002.
- 25 Cenci, L., Pulvirenti, L., Boni, G., Chini, M., Matgen, P., Gabellani, S., Squicciarino, G., and Pierdicca, N.: An evaluation of the potential of Sentinel 1 for improving flash flood predictions via soil moisture–data assimilation, *Advances in Geosciences*, 44, 89–100, <https://doi.org/10.5194/adgeo-44-89-2017>, 2017.
- 30 Clark, M. P., Slater, A. G., Rupp, D. E., Woods, R. A., Vrugt, J. A., Gupta, H. V., Wagener, T., and Hay, L. E.: Framework for Understanding Structural Errors (FUSE): A modular framework to diagnose differences between hydrological models, *Water Resources Research*, 44, <https://doi.org/doi.org/10.1029/2007WR006735>, 2008.
- Clark, M. P., Kavetski, D., and Fenicia, F.: Pursuing the method of multiple working hypotheses for hydrological modeling, *Water Resources Research*, 47, <https://doi.org/10.1029/2010WR009827>, w09301, 2011.
- 35 Clark, M. P., Nijssen, B., Lundquist, J. D., Kavetski, D., Rupp, D. E., Woods, R. A., Freer, J. E., Gutmann, E. D., Wood, A. W., Brekke, L. D., et al.: A unified approach for process-based hydrologic modeling: 1. Modeling concept, *Water Resources Research*, 51, 2498–2514, <https://doi.org/10.1002/2015WR017198>, 2015a.
- Clark, M. P., Nijssen, B., Lundquist, J. D., Kavetski, D., Rupp, D. E., Woods, R. A., Freer, J. E., Gutmann, E. D., Wood, A. W., Gochis, D. J., et al.: A unified approach for process-based hydrologic modeling: 2. Model implementation and case studies, *Water Resources Research*, 51, 2515–2542, <https://doi.org/10.1002/2015WR017200>, 2015b.
- 5 Colmet Daage, A., Ricci, S., Sanchez-Gomez, E., and Valérie, B. E.: Climate change impacts on precipitation extremes, flows and flash floods in Mediterranean mesoscale catchments, in: *International Congress on Environmental Modelling and Software*, 2016.
- Coxon, G., Freer, J., Wagener, T., Odoni, N., and Clark, M.: Diagnostic evaluation of multiple hypotheses of hydrological behaviour in a limits-of-acceptability framework for 24 UK catchments, *Hydrological processes*, 28, 6135–6150, <https://doi.org/doi.org/10.1002/hyp.10096>, 2014.
- 10 Delrieu, G., Nicol, J., Yates, E., Kirstetter, P.-E., Creutin, J.-D., Anquetin, S., Obled, C., Saulnier, G.-M., Ducrocq, V., Gaume, E., Payrastré, O., Andrieu, H., Aral, P.-A., Bouvier, C., Neppel, L., Livet, M., Lang, M., du Châtelet, J. P., Walpersdorf, A., and Wobrock, W.: The Catastrophic Flash-Flood Event of 8 - 9 September 2002 in the Gard Region, France: A First Case Study for the Cévennes Vivarais Mediterranean Hydrometeorological Observatory, *J. Hydrometeor*, 6, 34–52, <https://doi.org/10.1175/JHM-400.1>, 2005.
- Douinot, A.: Analyse des processus d'écoulement lors de crues à cinétique rapide sur l'arc méditerranéen, Ph.D. thesis, Université Paul Sabatier, Toulouse, 2016.
- 15 Douinot, A., Roux, H., Garambois, P.-A., Larnier, K., Labat, D., and Dartus, D.: Accounting for rainfall systematic spatial variability in flash flood forecasting, *Journal of Hydrology*, 541, 359–370, <https://doi.org/10.1016/j.jhydrol.2015.08.024>, 2016.
- Douinot, A., Roux, H., and Dartus, D.: Modelling errors calculation adapted to rainfall–Runoff model user expectations and discharge data uncertainties, *Environmental Modelling & Software*, 90, 157–166, <https://doi.org/10.1016/j.envsoft.2017.01.007>, 2017.



- 20 Drobinski, P., Ducrocq, V., Alpert, P., Anagnostou, E., Béranger, K., Borga, M., Braud, I., Chanzy, A., Davolio, S., Delrieu, G., et al.: HyMeX: a 10-year multidisciplinary program on the mediterranean water cycle, *Bulletin of the American Meteorological Society*, 95, 1063–1082, <https://doi.org/10.1175/BAMS-D-12-00242.1>, 2014.
- Enenkel, M., Reimer, C., Dorigo, W., Wagner, W., Pfeil, I., Parinussa, R., and De Jeu, R.: Combining satellite observations to develop a global soil moisture product for near-real-time applications, *Hydrology and Earth System Sciences*, 20, 4191, <https://doi.org/10.5194/hess-20-4191-2016>, 2016.
- 25 Faccini, F., Paliaga, G., Piana, P., Sacchini, A., and Watkins, C.: The Bisagno stream catchment (Genoa, Italy) and its major floods: geomorphic and land use variations in the last three centuries, *Geomorphology*, 273, 14 – 27, <https://doi.org/10.1016/j.geomorph.2016.07.037>, 2016.
- Fenicia, F., Kavetski, D., and Savenije, H. H.: Elements of a flexible approach for conceptual hydrological modeling: 1. Motivation and theoretical development, *Water Resources Research*, 47, <https://doi.org/10.1029/2010WR010174>, 2011.
- 30 Fenicia, F., Kavetski, D., Savenije, H. H., Clark, M. P., Schoups, G., Pfister, L., and Freer, J.: Catchment properties, function, and conceptual model representation: is there a correspondence?, *Hydrological Processes*, 28, 2451–2467, <https://doi.org/10.1002/hyp.9726>, 2014.
- Fenicia, F., Kavetski, D., Savenije, H. H. G., and Pfister, L.: From spatially variable streamflow to distributed hydrological models: Analysis of key modeling decisions, *Water Resources Research*, 52, 954–989, <https://doi.org/10.1002/2015WR017398>, 2016.
- 35 Garambois, P., Larnier, K., Roux, H., Labat, D., and Dartus, D.: Analysis of flash flood-triggering rainfall for a process-oriented hydrological model, *Atmospheric Research*, 137, 14 – 24, <https://doi.org/10.1016/j.atmosres.2013.09.016>, 2014.
- Garambois, P., Roux, H., Larnier, K., Labat, D., and Dartus, D.: Characterization of catchment behaviour and rainfall selection for flash flood hydrological model calibration: catchments of the eastern Pyrenees, *Hydrological Sciences Journal*, 60, 424–447, <https://doi.org/10.1080/02626667.2014.909596>, 2015a.
- Garambois, P.-A.: Etude régionale des crues éclair de l’arc méditerranéen français. Elaboration de méthodologies de transfert à des bassins versants non jaugés (Regional study of the flash flood events in the French Mediterranean area: on the methods for transferring information to ungauged catchment), Ph.D. thesis, Institut de Mécanique des Fluides de Toulouse - IMFT (Toulouse, France), 2012.
- 5 Garambois, P. A., Roux, H., Larnier, K., Castaing, W., and Dartus, D.: Characterization of process-oriented hydrologic model behavior with temporal sensitivity analysis for flash floods in Mediterranean catchments, *Hydrology and Earth System Sciences*, 17, 2305–2322, <https://doi.org/10.5194/hess-17-2305-2013>, 2013.
- Garambois, P.-A., Roux, H., Larnier, K., Labat, D., and Dartus, D.: Parameter regionalization for a process-oriented distributed model dedicated to flash floods, *Journal of Hydrology*, 525, 383–399, 2015b.
- 10 Gaume, E. and Borga, M.: Etat des connaissances récentes acquises sur les crues éclair en Europe: bilan du projet de recherches européen HYDRATE (2006-2010) (State of the art on the knowledge recently acquired on flash floods in Europe: results of the European research project HYDRATE (2006-2010)), *La Houille Blanche*, pp. 24–30, <https://doi.org/10.1051/lhb/2013012>, 2013.
- Gaume, E., Bain, V., Bernardara, P., Newinger, O., Barbuc, M., Bateman, A., Blaskovicova, L., Blöschl, G., Borga, M., Dumitrescu, A., Daliakopoulos, I., Garcia, J., Irimescu, A., Kohnova, S., Koutroulis, A., Marchi, L., Matreata, S., Medina, V., Preciso, E., Sempere-Torres, D., Stancalie, G., Szolgay, J., Tsanis, I., Velasco, D., and Viglione, A.: A compilation of data on European flash floods, *Journal of Hydrology*, 367, 70 – 78, <https://doi.org/10.1016/j.jhydrol.2008.12.028>, 2009.
- 15 Gourley, J. J., Flamig, Z. L., Vergara, H., Kirstetter, P.-E., III, R. A. C., Argyle, E., Arthur, A., Martinaitis, S., Terti, G., Erlingis, J. M., Hong, Y., and Howard, K. W.: The FLASH Project: Improving the Tools for Flash Flood Monitoring and Prediction across the United States, *Bulletin of the American Meteorological Society*, 98, 361–372, <https://doi.org/10.1175/BAMS-D-15-00247.1>, 2017.

- 20 Habets, F., Boone, A., Champeaux, J.-L., Etchevers, P., Franchisteguy, L., Leblois, E., Ledoux, E., Le Moigne, P., Martin, E., Morel, S., et al.: The SAFRAN-ISBA-MODCOU hydrometeorological model applied over France, *Journal of Geophysical Research: Atmospheres* (1984–2012), 113, <https://doi.org/10.1029/2007JD008548>, 2008.
- Hegedüs, P., Czigány, S., Balatonyi, L., and Pirkhoffer, E.: Analysis of soil boundary conditions of flash floods in a small basin in SW Hungary, *Open Geosciences*, 5, 97–111, <https://doi.org/10.2478/s13533-012-0119-6>, 2013.
- 25 Jacq, V.: Inventaire des situations à précipitations diluviennes sur la région Languedoc-Roussillon, la Provence-Alpes Cotes d’azur et la Corse, période 1958-1994 (Inventory of the extreme rainfall events that have occurred between 1958-1994 in the Languedoc-Roussillon, the Provence-Alpes Cotes d’azur and the Corse regions), *Phénomènes remarquables*, 1994.
- Katsura, S., Kosugi, K., Yamakawa, Y., and Mizuyama, T.: Field evidence of groundwater ridging in a slope of a granite watershed without the capillary fringe effect, *Journal of Hydrology*, 511, 703–718, <https://doi.org/10.1016/j.jhydrol.2014.02.021>, 2014.
- 30 Katsuyama, M., Ohte, N., and Kabeya, N.: Effects of bedrock permeability on hillslope and riparian groundwater dynamics in a weathered granite catchment, *Water Resources Research*, 41, <https://doi.org/10.1029/2004WR003275>, 2005.
- Kirchner, J. W.: Catchments as simple dynamical systems: Catchment characterization, rainfall-runoff modeling, and doing hydrology backward, *Water Resources Research*, 45, <https://doi.org/10.1029/2008WR006912>, 2009.
- Laganier, O., Ayrat, P., Salze, D., and Sauvagnargues, S.: A coupling of hydrologic and hydraulic models appropriate for the fast floods of the Gardon River basin (France), *Natural Hazards and Earth System Sciences*, 14, 2899–2920, <https://doi.org/10.5194/nhess-14-2899-2014>, 2014.
- 35 Lang, M., Arnaud, P., Carreau, J., Deaux, N., Dezileau, L., Garavaglia, F., Latapie, A., Neppel, L., Paquet, E., Renard, B., Soubeyroux, J., Terrier, B., Veyssière, J., Aubert, Y., Auffray, A., Borch, F., Bernardara, P., Carré, J., Chambon, D., Cipriani, T., Delgado, J., Doumenc, H., Fantin, R., Jourdain, S., Kochanek, K., Paquier, A., Sauquet, E., and Tramblay, Y.: ExtraFlo project (ANR 2009-2013) on extreme rainfall and flood assessment: main outcomes, *La Houille Blanche - Revue internationale de l’eau*, 2, 5–13, <https://doi.org/10.1051/lhb/2014010>, 2014.
- Le Bourgeois, O., Bouvier, C., Brunet, P., and Ayrat, P.-A.: Inverse modeling of soil water content to estimate the hydraulic properties of a shallow soil and the associated weathered bedrock, *Journal of Hydrology*, <https://doi.org/10.1016/j.jhydrol.2016.01.067>, 2016.
- 5 Le Coz, J., Renard, B., Bonnifait, L., Branger, F., and Boursicaud, R. L.: Combining hydraulic knowledge and uncertain gaugings in the estimation of hydrometric rating curves: A Bayesian approach, *Journal of Hydrology*, 509, 573 – 587, <https://doi.org/10.1016/j.jhydrol.2013.11.016>, 2014.
- Le Lay, M. and Saulnier, G.-M.: Exploring the signature of climate and landscape spatial variabilities in flash flood events: Case of the 8–9 September 2002 Cévennes-Vivaraïcs catastrophic event, *Geophysical research letters*, 34, <https://doi.org/10.1029/2007GL029746>, 2007.
- 10 Ledoux, E., Girard, G., De Marsily, G., Villeneuve, J., and Deschenes, J.: Spatially distributed modeling: conceptual approach, coupling surface water and groundwater, in: *Unsaturated Flow in Hydrologic Modeling*, pp. 435–454, Springer, 1989.
- Ley, R., Hellebrand, H., Casper, M. C., and Fenicia, F.: Is Catchment Classification Possible by Means of Multiple Model Structures? A Case Study Based on 99 Catchments in Germany, *Hydrology*, 3, 22, <https://doi.org/10.3390/hydrology3020022>, 2016.
- 15 Llasat, M. C., Marcos, R., Llasat-Botija, M., Gilabert, J., Turco, M., and Quintana-Segu, P.: Flash flood evolution in North-Western Mediterranean, *Atmospheric Research*, 149, 230 – 243, <https://doi.org/10.1016/j.atmosres.2014.05.024>, 2014.
- Lobligeois, F.: Mieux connaître la distribution spatiale des pluies améliore-t-il la modélisation des crues? Diagnostic sur 181 bassins versants français (Is the spatial distribution of the rainfall observation improving flood modelling? Diagnostic over 181 French catchments), Ph.D. thesis, AgroParisTech, Paris, <https://pastel.archives-ouvertes.fr/tel-01134990>, 2014.

- 20 Mahfouf, J., Manzi, A., Noilhan, J., Giordani, H., and Déqué, M.: The land surface scheme ISBA within the Météo-France climate model ARPEGE. Part I. Implementation and preliminary results, *Journal of Climate*, 8, 2039–2057, [https://doi.org/10.1175/1520-0442\(1995\)008<2039:TLSSIW>2.0.CO;2](https://doi.org/10.1175/1520-0442(1995)008<2039:TLSSIW>2.0.CO;2), 1995.
- Marchandise, A. and Viel, C.: Utilisation des indices d’humidité de la chaîne Safran-Isba-Modcou de Météo-France pour la vigilance et la prévision opérationnelle des crues (Using the Météo-France Safran-Isba-Modcou data for operational flood warning and forecasting), *La Houille Blanche*, pp. 35–41, <https://doi.org/10.1051/lhb/2009075>, 2009.
- 25 Maréchal, D., Ayral, P.-A., Bailly, J.-S., Puech, C., and Sauvagnargues-Lesage, S.: Sur l’origine morphologique des écoulements par l’analyse d’observations hydrologiques distribuées. Application à deux bassins versants cévenols (Gard, France). Relation between the flow processes and the catchment morphology through the analysis of the distributed hydrological observations : case of two Cevenol catchments (France), *Géomorphologie: relief, processus, environnement*, 19, 47–62, <https://doi.org/10.4000/geomorphologie.10120>, 2013.
- 30 Maréchal, J.-C., Ladouche, B., and Dörfliger, N.: Analyse hydrogéologique de la contribution de l’eau souterraine à la crue éclair des 6 et 8 septembre 2005 à Nîmes (Hydrogeological analysis of groundwater contribution to the 6-8 September 2005 flash flood in Nîmes), *La Houille Blanche*, pp. 88–93, 2009.
- Mateo Lázaro, J., Sánchez Navarro, J. Á., García Gil, A., and Edo Romero, V.: Sensitivity analysis of main variables present in flash flood processes. Application in two Spanish catchments: Arás and Aguilón, *Environmental Earth Sciences*, 71, 2925–2939, <https://doi.org/10.1007/s12665-013-2668-5>, 2014.
- 35 Maubourguet, M.-M., Chorda, J., Dartus, D., and George, J.: Prévision des crues éclair sur le Gardon d’Anduze (Flash flood forecasting in the Gardon catchment at Anduze), in: 1st Mediterranean-HyMeX Workshop - Hydrological cycle in Mediterranean Experiment, 9-11 January 2007, Météo-France, Toulouse, France, 2007.
- McDonnell, J., Sivapalan, M., Vaché, K., Dunn, S., Grant, G., Haggerty, R., Hinz, C., Hooper, R., Kirchner, J., Roderick, M., et al.: Moving beyond heterogeneity and process complexity: A new vision for watershed hydrology, *Water Resources Research*, 43, <https://doi.org/10.1029/2006WR005467>, 2007.
- 5 McDonnell, J. J. and Beven, K.: Debates—The future of hydrological sciences: A (common) path forward? A call to action aimed at understanding velocities, celerities and residence time distributions of the headwater hydrograph, *Water Resources Research*, 50, 5342–5350, <https://doi.org/10.1002/2013WR015141>, 2014.
- MNT BDALTI: MNT BDALTI, Institut national de l’information géographique et forestière (IGN-F), résolution 250 m, 2016.
- 10 Payrastre, O., NAULIN, J. P., Nguyen, C. C., and Gaume, E.: Analyse hydrologique des crues de juin 2010 dans le Var (Hydrological analysis of the flash flood of the Var region, June 2010), Research report, IFSTTAR - Institut Français des Sciences et Technologies des Transports, de l’Aménagement et des Réseaux, <https://hal.archives-ouvertes.fr/hal-01272025>, 2012.
- Perrin, C., Van Esse, W., Booij, M., Augustijn, D., Lobligeois, F., and Fencia, F.: The influence of conceptual model structure on model performance: a comparative study for 237 French catchments, *Hydrology and Earth System Sciences Discussions*, 10 (4), 2013, 2013.
- 15 Pfister, L., Martínez-Carreras, N., Hissler, C., Klaus, J., Carrer, G. E., Stewart, M. K., and McDonnell, J. J.: Bedrock geology controls on catchment storage, mixing, and release: A comparative analysis of 16 nested catchments, *Hydrological Processes*, 31, 1828–1845, <https://doi.org/10.1002/hyp.11134>, hYP-16-0708.R1, 2017a.
- Pfister, L., Wetzel, C. E., Klaus, J., Martínez-Carreras, N., Antonelli, M., Teuling, A. J., and McDonnell, J. J.: Terrestrial diatoms as tracers in catchment hydrology: a review, *Wiley Interdisciplinary Reviews: Water*, 4, <https://doi.org/doi.org/10.1002/wat2.1241>, 2017b.

- 20 Raynaud, D., Thielen, J., Salamon, P., Burek, P., Anquetin, S., and Alfieri, L.: A dynamic runoff co-efficient to improve flash flood early warning in Europe: evaluation on the 2013 central European floods in Germany, *Meteorological Applications*, 22, 410–418, <https://doi.org/10.1002/met.1469>, 2015.
- Ribolzi, O., Moussa, R., Gaudu, J.-C., Vallès, V., and Voltz, M.: Etude des crues de transition entre période sèche et période humide, par traçage naturel sur un bassin versant méditerranéen cultivé, *Comptes Rendus de l'Académie des Sciences - Series IIA - Earth and Planetary Science*, 324, 985 – 992, [https://doi.org/https://doi.org/10.1016/S1251-8050\(97\)83983-3](https://doi.org/https://doi.org/10.1016/S1251-8050(97)83983-3), 1997.
- 25 Robbez-Masson, J., Mazzoni, C., Vallejo, S., Ernesty, D., and Falipou, P.: A regional multimedia soil and landscape database on the web in order to help use and teaching of soil data, in: 17th World congress of Soil Science, Bangkok, Thailand, pp. 14–21, 2002.
- Roux, H., Labat, D., Garambois, P.-A., Maubourguet, M.-M., Chorda, J., and Dartus, D.: A physically-based parsimonious hydrological model for flash floods in Mediterranean catchments, *Natural Hazards and Earth System Science*, 11, 2567–2582, <https://doi.org/10.5194/nhess-11-2567-2011>, 2011.
- 30 Ruin, I., Creutin, J.-D., Anquetin, S., and Lutoff, C.: Human exposure to flash floods - Relation between flood parameters and human vulnerability during a storm of September 2002 in Southern France, *Journal of Hydrology*, 361, 199–213, <https://doi.org/10.1016/j.jhydrol.2008.07.044>, tY - JOUR, 2008.
- Sangati, M., Borga, M., Rabuffetti, D., and Bechini, R.: Influence of rainfall and soil properties spatial aggregation on extreme flash flood response modelling: an evaluation based on the Sesia river basin, North Western Italy, *Advances in Water Resources*, 32, 1090–1106, 2009.
- 35 Sayama, T., McDonnell, J. J., Dhakal, A., and Sullivan, K.: How much water can a watershed store?, *Hydrological Processes*, 25, 3899–3908, <https://doi.org/10.1002/hyp.8288>, 2011.
- Sivapalan, M.: Process complexity at hillslope scale, process simplicity at the watershed scale: is there a connection?, *Hydrological Processes*, 17, 1037–1041, <https://doi.org/10.1002/hyp.5109>, 2003.
- Tabary, P.: The new French operational radar rainfall product. Part I: Methodology., *Weather & Forecasting*, 22, <https://doi.org/doi:10.1175/WAF1004.1>, 2007.
- 955 Troch, P. A., Berne, A., Bogaart, P., Harman, C., Hilberts, A. G. J., Lyon, S. W., Paniconi, C., Pauwels, V. R. N., Rupp, D. E., Selker, J. S., Teuling, A. J., Uijlenhoet, R., and Verhoest, N. E. C.: The importance of hydraulic groundwater theory in catchment hydrology: The legacy of Wilfried Brutsaert and Jean-Yves Parlange, *Water Resources Research*, 49, 5099–5116, <https://doi.org/10.1002/wrcr.20407>, 2013.
- UNISDR: UNISDR Terminology on Disaster Risk Reduction, <http://www.unisdr.org/eng/terminology/terminology-2009-eng.html>(2009), 2009.
- 960 Van Genuchten, M. T.: A closed-form equation for predicting the hydraulic conductivity of unsaturated soils, *Soil science society of America journal*, 44, 892–898, 1980.
- Vannier, O., Braud, I., and Anquetin, S.: Regional estimation of catchment-scale soil properties by means of streamflow recession analysis for use in distributed hydrological models, *Hydrological Processes*, <https://doi.org/10.1002/hyp.10101>, 2013.
- Vidal, J.-P., Martin, E., Franchisteguy, L., Baillon, M., and Soubeyroux, J.-M.: A 50-year high-resolution atmospheric reanalysis over France with the Safran system, *International Journal of Climatology*, 30, 1627–1644, <https://doi.org/10.1002/joc.2003>, 2010.
- 965 Viglione, A., Chirico, G. B., Woods, R., and Blöschl, G.: Generalised synthesis of space–time variability in flood response: An analytical framework, *Journal of Hydrology*, 394, 198–212, <https://doi.org/10.1016/j.jhydrol.2010.05.047>, 2010.

Zocatelli, D., Borga, M., Zanon, F., Antonescu, B., and Stancalie, G.: Which rainfall spatial information for flash flood response modelling? A numerical investigation based on data from the Carpathian range, Romania, *Journal of Hydrology*, 394, 148 – 161, 970 <https://doi.org/10.1016/j.jhydrol.2010.07.019>, 2010.
